# Supplementary material for: Factors associated with COVID-19 infections and mortality in Africa: a cross-sectional study using publicly available data
Source: PubMed Central journal article supplement — BMJ Open. 2020 Nov 11;10(11):e042750. doi: 10.1136/bmjopen-2020-042750 (PMC7661348; doi:10.1136/bmjopen-2020-042750), 2020-11-11
Supplement: bmjopen-2020-042750.draft_revisions.pdf [file bmjopen-2020-042750.draft_revisions.pdf]

# BMJ Open

BMJ Open is committed to open peer review. As part of this commitment we make the peer review history of every article we publish publicly available.

When an article is published we post the peer reviewers' comments and the authors' responses online. We also post the versions of the paper that were used during peer review. These are the versions that the peer review comments apply to.

The versions of the paper that follow are the versions that were submitted during the peer review process. They are not the versions of record or the final published versions. They should not be cited or distributed as the published version of this manuscript.

BMJ Open is an open access journal and the full, final, typeset and author-corrected version of record of the manuscript is available on our site with no access controls, subscription charges or pay-per-view fees (<http://bmjopen.bmj.com>).

If you have any questions on BMJ Open's open peer review process please email [info.bmjopen@bmj.com](mailto:info.bmjopen@bmj.com)

# BMJ Open

## COVID-19 and Mortality: A Statistical Analysis of African Countries

|                               |                                                                                                                                                                                                                                                                                                                                             |
|-------------------------------|---------------------------------------------------------------------------------------------------------------------------------------------------------------------------------------------------------------------------------------------------------------------------------------------------------------------------------------------|
| Journal:                      | <i>BMJ Open</i>                                                                                                                                                                                                                                                                                                                             |
| Manuscript ID                 | bmjopen-2020-042750                                                                                                                                                                                                                                                                                                                         |
| Article Type:                 | Original research                                                                                                                                                                                                                                                                                                                           |
| Date Submitted by the Author: | 18-Jul-2020                                                                                                                                                                                                                                                                                                                                 |
| Complete List of Authors:     | Okeahalam, Charles; University of the Witwatersrand, School of Economics and Finance, Faculty of Commerce<br>Williams, Victor; University of the Witwatersrand, School of Public Health, Faculty of Health Sciences<br>Otwombe, Kennedy; University of the Witwatersrand Perinatal HIV Research Unit, Statistics and Data Management Centre |
| Keywords:                     | COVID-19, EPIDEMIOLOGY, PUBLIC HEALTH, STATISTICS & RESEARCH METHODS                                                                                                                                                                                                                                                                        |
|                               |                                                                                                                                                                                                                                                                                                                                             |

SCHOLARONE™  
Manuscripts

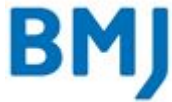

I, the Submitting Author has the right to grant and does grant on behalf of all authors of the Work (as defined in the below author licence), an exclusive licence and/or a non-exclusive licence for contributions from authors who are: i) UK Crown employees; ii) where BMJ has agreed a CC-BY licence shall apply, and/or iii) in accordance with the terms applicable for US Federal Government officers or employees acting as part of their official duties; on a worldwide, perpetual, irrevocable, royalty-free basis to BMJ Publishing Group Ltd ("BMJ") its licensees and where the relevant Journal is co-owned by BMJ to the co-owners of the Journal, to publish the Work in this journal and any other BMJ products and to exploit all rights, as set out in our [licence](#).

The Submitting Author accepts and understands that any supply made under these terms is made by BMJ to the Submitting Author unless you are acting as an employee on behalf of your employer or a postgraduate student of an affiliated institution which is paying any applicable article publishing charge ("APC") for Open Access articles. Where the Submitting Author wishes to make the Work available on an Open Access basis (and intends to pay the relevant APC), the terms of reuse of such Open Access shall be governed by a Creative Commons licence – details of these licences and which [Creative Commons](#) licence will apply to this Work are set out in our licence referred to above.

Other than as permitted in any relevant BMJ Author's Self Archiving Policies, I confirm this Work has not been accepted for publication elsewhere, is not being considered for publication elsewhere and does not duplicate material already published. I confirm all authors consent to publication of this Work and authorise the granting of this licence.

## Title: COVID-19 and Mortality: A Statistical Analysis of African Countries

Charles Okeahalam<sup>1</sup>, Victor Williams<sup>2</sup>, Kennedy Otwombe<sup>2,3</sup>

<sup>1</sup>School of Economics and Finance, Faculty of Commerce, University of the Witwatersrand

<sup>2</sup>School of Public Health, Faculty of Health Sciences, University of the Witwatersrand

<sup>3</sup>Perinatal HIV Research Unit, Faculty of Health Sciences, University of the Witwatersrand

Corresponding author: [otwombek@phru.co.za](mailto:otwombek@phru.co.za)

### **Abstract**

#### **Introduction**

The current COVID-19 pandemic is a global threat. This elicits questions on the level of preparedness and capacity of health systems to respond to emergencies. Relative to other parts of the world, Africa has poorly developed health systems with limited capacity to respond to health crises. Africa is particularly disadvantaged.

#### **Methods**

This cross-sectional study uses publicly available core health data for 53 African countries, to determine risk factors for cumulative COVID-19 deaths and cases per million in all countries in the continent. Descriptive statistics were determined for the indicators and a negative binomial regression was used for modelling the risk factors.

#### **Results**

In Sub-Saharan Africa, an increase in the number of nursing and midwifery personnel decreased the risk of COVID-19 deaths ( $p=0.0178$ ) while a unit increase in UHC index of service coverage and prevalence of insufficient physical activity among adults increased the risk of COVID-19 deaths ( $p=0.0432$  and  $p=0.0127$ ). An increase in the proportion of infants initiating breastfeeding reduced the number of cases per million ( $p<0.0001$ ) while an increase in higher healthy life expectancy at birth increased the number of cases per million ( $p=0.0340$ ).

#### **Conclusion**

Despite its limited resources, Africa's preparedness and response to the COVID-19 pandemic can be improved by identifying and addressing *specific* gaps in the funding of health services delivery. These gaps impact negatively on service delivery but appear to have received limited funding and policy priority.

## Article Summary

### a. Strengths of the study:

- i. Use of a robust statistical analysis method
- ii. Identification of key evidence-based factors that might mitigate COVID-19 deaths and infections in Africa.
- iii. Identification of a significant factor in the population which may offer protection against COVID-19.
- iv. Innovative use of publicly available data which can easily be accessed and verified

### b. Limitations of the study:

- i. Some countries had missing data in some of the indicators analyzed.
- ii. Use of multiple imputation technique which may have caused a slight overestimate of the variance

## Introduction

1  
2  
3  
4  
5 In January 2020, the severe acute respiratory syndrome coronavirus 2 (SARS-CoV-2)  
6 popularly referred to as COVID-19 was identified as the cause of unknown pneumonia  
7 in Wuhan, China. Two months later the World Health Organisation (WHO) classified  
8 COVID-19 as a pandemic. COVID-19 is a global health threat. Since March 2020, there  
9 has been a rapid increase in the number of cases globally. As of June 16th 2020,  
10 there had been more than 7.8 million confirmed cases and 431,541 deaths and the  
11 numbers continue to rise exponentially.<sup>1 2</sup> In a bid to stop the virus spreading, there has  
12 been a global restriction on all activities.<sup>3 4</sup> The economic impact of a global shutdown  
13 and pressure on frail health systems of many countries across the world presents  
14 great uncertainty for the remaining half of the year and the immediate future.  
15  
16

17  
18 The United States of America, Brazil, the United Kingdom and countries in Western  
19 Europe notably Italy, Spain and France account for the highest number of COVID-19  
20 cases and mortality.<sup>2</sup> With the possible exception of Brazil, these countries have  
21 advanced health systems, reliable epidemic surveillance and response systems and  
22 have been able to mobilize resources with which to respond. However, due to the  
23 sudden increase in demand for health personnel, test kits, emergency care equipment  
24 and personal protective equipment, the health systems of all affected countries have  
25 been put under significant strain. With varying efficacy, the affected countries have  
26 increased hospital facilities for critical cases, increased the daily number of tests to  
27 identify positive cases and increased provision of personal protective equipment (PPE)  
28 for health personnel.<sup>4 5</sup>  
29  
30

31  
32 At present, in comparison to the USA, and Europe, Africa has a lower number of cases  
33 and lower daily increase in infection. While this may seem an advantage, the WHO  
34 continues to express concern about the impact COVID may have on Africa. This is  
35 because, from the perspective of capacity, African countries are in a parlous situation  
36 relative to Europe, North America and some parts of Asia. The health systems of  
37 many African countries have limited ability to roll out widespread community screening  
38 and testing, few health personnel, and limited emergency facilities to manage critically ill  
39 COVID-19 patients<sup>6</sup>. And the easing of restrictions on social and economic activities  
40 is likely to lead to an increase in the number of cases of COVID-19 in African countries.  
41 So with the best will and effort, African countries cannot use the same methodology to  
42 respond and contain the pandemic to the level of the developed countries that have  
43 performed badly, let alone to that of those that have performed well. If they are to use  
44 their limited capacity efficiently, it is imperative African countries clearly identify factors  
45 that will support that objective and institute effective evidence-based approaches to  
46 managing COVID-19. Accordingly, in a bid to support focus on efficient capacity  
47 development, this study analyzes the relationship between health indicators and  
48 COVID-19 deaths and cases in African countries. It is the first paper of this type from  
49 Africa.  
50  
51  
52  
53  
54  
55

## 56 **Methodology**

57  
58  
59  
60

### Data Source

This is a cross-sectional study that has used data extracted from the World Health Organisation Global Health Observatory Repository.<sup>7</sup> Before extraction, the research team reviewed available indicators in the 2018 Global Reference List of 100 Core Health Indicators (plus health-related SDGs)<sup>8</sup> and listed different indicators by thematic areas. These indicators directly or indirectly describe the ability of a country's health system to respond to the health needs of the population. Data on confirmed cases of coronavirus and deaths were obtained from the Worldometer Coronavirus Live Update.<sup>9</sup>

### Definition of variables

*BCG immunization coverage among 1-year olds (%)*: BCG immunization coverage among 1-year olds (%).<sup>10</sup>

*Nursing and midwifery personnel (per 10 000 population)*: It is the density of nurses and midwifery personnel per 10 000 people.<sup>10</sup>

*UHC index of service coverage*: Coverage of essential health services such as reproductive, maternal, newborn and child health amongst others.<sup>10</sup>

*Prevalence of insufficient physical activity among adults aged 18+ years*: Insufficient physical activity was defined as adults not meeting the WHO recommendations on physical activity for health i.e., at least 150 min of moderate-intensity, or 75 min of vigorous-intensity physical activity per week, or any equivalent combination of the two.<sup>11</sup>

*Early initiation of breastfeeding (%)*: Initiation of breastfeeding within the first hour of birth and exclusively breastfed for the first six months of life.<sup>12</sup>

*Healthy life expectancy at birth (years)*: This is a life expectancy estimate that applies disability weights to health states to compute the equivalent number of years of good health that a new born can expect.<sup>13</sup>

*Prevalence of overweight among adults*: Adults with a body mass index  $\geq 30$ .

*Current health expenditure (CHE) as a percentage of gross domestic product (GDP)*: This indicates the level of resources channelled to health relative to other uses.<sup>10</sup>

### Data Management

Data for 32 indicators (or variables) from 12 thematic areas was extracted from the 2018 Global Reference List of 100 Core Health Indicators. The 12 thematic areas are Mortality by Age and Sex, Mortality by Cause, Morbidity, Nutrition, Environmental Risk Factors, Non-Communicable Diseases, Immunization, Essential health services, Utilization and access, Health workforce, Health Information and Health financing.

Data were extracted in .xls format for each variable and imported into STATA 15.0 software (StataCorp LLC College Station, TX). For each variable, the most recent data for all countries included in the study was retained with the corresponding year and country name and saved in .dta format. The different variables were merged using the country name as the unique identifier to obtain the final data set used for the analysis. The countries were further categorized into their assigned WHO region and World Bank income group.

### **Statistical methodology**

1  
2  
3  
4 All data on health indicators were continuous and were analysed descriptively using  
5 medians, interquartile ranges (IQR) and the range of the measures were determined by  
6 the minimum and maximum values.  
7

8  
9 Of the 53 countries included in the analysis, there were varying proportions of missing  
10 data with the majority missing less than 10% of the data. To address this, we assumed  
11 a missing at random mechanism and applied a multiple imputation technique with ten  
12 imputations and summarised the results across all the datasets. The fit of the multiple  
13 imputation was evaluated using variance information measures including relative  
14 efficiency.  
15

16  
17 Due to its flexibility in allowing for overdispersion, risk factors for cumulative COVID-19  
18 deaths and cases per million were fitted using the negative binomial regression. Both  
19 univariate and multivariate regression models were fitted. In the multivariate model. A  
20 full model was fitted first and then structurally reduced using the backward selection  
21 procedure to arrive at the final model. Regression models were fitted for sub-Saharan  
22 Africa followed by all the countries in the continent. Model fit was assessed using the  
23 ratio of the deviance, scaled deviance, Pearson Chi-square and scaled Pearson  
24 Chi-square divided by the degrees of freedom. Additionally, we also assessed model fit  
25 using the cumulative sum of residual plots with 10 000 replications. Deaths and cases  
26 per million were those reported in the Worldometer as of 29<sup>th</sup> May 2020.  
27  
28

29 All statistical analysis was conducted using SAS Enterprise Guide 7.15 (SAS Institute  
30 Inc., NC, USA) using the procedures MEANS, GENMOD, MI, MIANALYZE.  
31  
32

## 33 **Results**

### 34 Characteristics

35 A total of 53 countries from Africa were included in this analysis (Table 1). The  
36 median number of cumulative COVID-19 deaths across the African continent was 12  
37 (IQR: 3-49), cumulative deaths per million [2, IQR:0.2-6.0], cumulative COVID-19 cases  
38 [820, IQR: 295-2216], cumulative cases per million [63, IQR: 17.0-243.0], current health  
39 expenditure was 5.3 (IQR: 3.9-6.9) and BCG immunisation coverage in 1-year olds was  
40 91.5% (IQR: 84.0-96.5). The median life expectancy was 63.2 years (IQR: 59.8-66.1),  
41 healthy life expectancy [55.7 years, IQR: 52.3-57.9] medical doctors per 10 000  
42 population was 1.6 (IQR: 0.8-4.0), nursing and midwifery personnel per 10 000 was 8.8  
43 (IQR: 4.4-15.5,) and universal health care (UHC) index of service coverage 0.5 (IQR:  
44 0.4-0.5).  
45  
46

### 47 Risk factors for sub-Saharan Africa

#### 48 Cumulative COVID-19 deaths

49 In the multivariate regression, modelling risk factors for COVID-19 deaths in  
50 sub-Saharan Africa and controlling for BCG immunization coverage, a unit increase in  
51 the number of nursing and midwifery personnel decreased the risk of death by 0.0426  
52 (p=0.0178) whereas a unit increase in the UHC index of service coverage and  
53 prevalence of insufficient physical activity among adults aged 18+ years increased the  
54 risk of COVID-19 deaths by 4.7049 (p=0.0432) and 0.0830 (p=0.0127) respectively.  
55  
56  
57  
58  
59  
60



### *Cumulative Cases per Million*

A unit increase in the proportion of infants initiating breastfeeding reduces the number of cases per million by 0.0563 ( $p < 0.0001$ ) whereas an increase in higher healthy life expectancy at birth increases the number of COVID-19 cases per million by 0.0417 ( $p = 0.0340$ ).

### *Risk factors for all the African countries*

#### *Cumulative COVID-19 deaths*

Early initiation of breastfeeding (Beta= -0.0514, p-value=0.0027) was associated with a lower risk of death whereas increasing healthy life expectancy at birth was associated with a higher risk of death (Beta=0.1059, p-value=0.0285).

#### *Cumulative cases per million*

An increase in the current health expenditure as a percentage of GDP (Beta=-0.1739, p-value=0.0397) and the percentage initiated early on breastfeeding (Beta=-0.0460, p-value=0.0061) was associated with a decrease in cases of COVID-19 per million

## **Discussion**

This study considers the factors associated with COVID-19 deaths and infection cases per million from 53 of 54 African countries.

In summary, our findings are that, controlling for BCG immunization coverage in sub-Saharan Africa, building health capacity by increasing the number of nursing and midwifery personnel will reduce COVID-19 deaths. However, we also find that higher UHC index of service coverage and prevalence of insufficient physical activity in adults  $\geq 18$  years increases fatalities. Additionally, having a population with a high proportion of people where breastfeeding had been initiated early, provided protection. A higher healthy life expectancy increased the risk of cases. This is not paradoxical but may point to the fact that the number of people who could contract the virus is augmented by longer life expectancy. When evaluating all the African countries, the initiation of early breastfeeding was protective against death whereas higher healthy life expectancy increased the risk of death. We also find that an increase in current health expenditure levels provide additional protection against COVID-19 infections.

Delving deeper into our results, the finding that an increase in the number of nursing and midwifery personnel reduced the risk of COVID-19 related mortality in sub-Saharan Africa echo findings from other parts of the world where the benefits of preparedness and available capacity has been shown to confer benefits in the management and care of patients.<sup>14 15</sup> Where capacity shortages exist in the health sector, there is potential for poor outcomes in the management and care of COVID-19 patients. Major gaps still exist in the implementation of the WHO International Health Regulations, notably increasing capacity of hospitals and appropriate injection of financial resources.<sup>15</sup> The results confirm the point made earlier that unlike the other COVID-19 affected parts of the world, Africa has less capacity to handle a major outbreak of COVID-19. Therefore,

1  
2  
3  
4 African governments will need to strengthen their overall health care systems and in  
5 doing so, specific focus needs to be placed on enhancing human resource capacity  
6 such as nurses, medical doctors and laboratory personnel.  
7

8  
9 Our findings also illustrate that a higher UHC index of service coverage increases the  
10 risk of fatalities. While counter-intuitive, this may be driven by the countries in  
11 sub-Saharan Africa with the largest economies that have also had the largest number of  
12 cases and mortality: South Africa and Nigeria. A large number of people from these two  
13 countries travel internationally, in particular to Europe and it is likely that they have  
14 contracted the disease there and have imported it back into their countries.<sup>16</sup> To assess  
15 the robustness of this finding, we conducted a sensitivity analysis by removing the data  
16 on South Africa and Nigeria and re-estimated the model. No major differences relative  
17 to the first regression were observed.  
18

19  
20 Additionally, that cohort of the population that travels internationally is generally able to  
21 afford COVID-19 test kits and conduct more tests. Testing is a critical requirement for  
22 effective management of COVID-19. Additionally, from a statistical perspective, testing  
23 identifies cases (which might otherwise have been unobserved) and severe cases result  
24 in deaths - which are then more accurately recorded. This increases the number of  
25 observations on deaths. This view is similar to that reported in a previous paper on the  
26 vulnerability of African countries to COVID-19 and their preparedness to mitigate.<sup>16</sup>  
27  
28

29  
30 More intuitively, we find that insufficient physical activity among adults aged 18+ years  
31 increased the risk of COVID-19 mortality. It is well documented in the literature that the  
32 lack of physical activity increases the risk of obesity.<sup>17</sup> Recent publications on  
33 COVID-19 related mortality, have shown that obesity elevates the risk of mortality.<sup>18 19</sup>  
34 We postulate that the population of Africans aged 18+ years who do not undertake  
35 sufficient physical activity may be similarly at high risk of mortality.  
36

37  
38 We also found that where a large population is exposed to early initiation of  
39 breastfeeding, there was protection against COVID-19 infection. Research on the  
40 long-term benefits of breastfeeding is growing and recent evidence suggests a  
41 protective effect against some chronic diseases in adulthood.<sup>20 21</sup> It may be that this  
42 protective effect extends to non-severe cases of COVID-19.  
43

44  
45 Further, in sub-Saharan Africa and all the African countries combined, higher healthy  
46 life expectancy (life expectancy that accounts for disabilities) in this study was  
47 associated with a higher risk of COVID-19 infection. Our findings are in tandem with  
48 previously published work on risk factors for COVID-19 infection from around the world  
49 that have shown older people at higher risk for COVID-19 infection. Being older is  
50 associated with lower immunity and inflammatory reactions and a higher risk of  
51 comorbidities such as diabetes and hypertension amongst others. Such factors  
52 predispose older cohorts of the population to COVID-19 infection.  
53

54  
55 In conclusion, this analysis is based on publicly available information. This negated the  
56 need to implement some standard procedures associated with non-public data such as  
57  
58  
59

1  
2  
3  
4 sampling, study design and data collection. And to control for these limitations and  
5 alleviate any potential bias, we applied the robust statistical methods described above.  
6 Our study confirms that an increase in current health expenditure reduces the risk of  
7 COVID-19 infection. This finding is consistent with widely reported results<sup>15</sup>. And, in line  
8 with WHO International Health Regulations, some African governments have indeed  
9 increased the proportion of the budget allocated to health.<sup>15 22</sup> However, often, this  
10 investment is not only insufficient, but is also inefficiently allocated. Therefore, a salient  
11 contribution of this paper is that, identification of the key evidence-based factors that  
12 might mitigate COVID-19 deaths and infections will improve national health budget  
13 allocative efficiency. This will enhance the capacity for African countries to combat the  
14 pandemic.  
15  
16

### Patient and public involvement

17  
18 This study utilised publicly available health indicators and aggregated COVID-19 cases  
19 and deaths. No patients were involved.  
20  
21

### Funding

22  
23 No funding was available for this study.  
24  
25

### Contributorship Statement

26  
27 CO developed the initial research concept, developing the hypothesis and methodology.  
28 VW did the data extraction and merging of the different data sets. KO participated in  
29 developing the hypothesis and conducted the data analysis. All the authors participated  
30 in interpreting the results and writing the manuscript.  
31  
32

### Data sharing statement

33  
34 Data used for the analysis in this manuscript is publicly available and can be accessed  
35 at the referenced websites. Further enquiries and requests for the data used in this  
36 paper can be made through sending an email to [otwombek@phru.co.za](mailto:otwombek@phru.co.za).  
37  
38

### Ethics, Funding and Data Sharing

- 39  
40 1. This study did not require ethical clearance as the data used for analysis is publicly  
41 available. Precautions were, however, adopted to document steps taken during data  
42 extraction, cleaning and analysis.  
43 2. This manuscript did not receive funding from any organization and the authors  
44 declare no competing interest.  
45  
46

### Dryad identifier

47  
48 doi:10.5061/dryad.cnp5hqc2r  
49  
50  
51  
52  
53  
54  
55  
56  
57  
58  
59  
60

## Reference

1. Huang R, Xia J, Chen Y, et al. A family cluster of SARS-CoV-2 infection involving 11 patients in Nanjing, China. *The Lancet Infectious Diseases* 2020;20(5):534-35.
2. World Health Organisation. Coronavirus Disease (COVID-19) Dashboard Geneva: WHO; 2020 [cited 2020 15 June]. Available from: <https://covid19.who.int/> accessed 15 June 2020.
3. World Health Organisation. Novel Coronavirus (2019-nCoV) SITUATION REPORT - 1. 21 January 2020 Geneva: WHO; 2020 [cited 2020 14 June]. Available from: [https://www.who.int/docs/default-source/coronaviruse/situation-reports/20200121-sitrep-1-2019-ncov.pdf?sfvrsn=20a99c10\\_4](https://www.who.int/docs/default-source/coronaviruse/situation-reports/20200121-sitrep-1-2019-ncov.pdf?sfvrsn=20a99c10_4) accessed 14 June 2020.
4. World Health O. Critical preparedness, readiness and response actions for COVID-19: interim guidance, 22 March 2020: World Health Organization, 2020.
5. Remuzzi A, Remuzzi G. COVID-19 and Italy: what next? *The Lancet* 2020;395(10231)
6. Velavan TP, Meyer CG. The COVID-19 epidemic. *Tropical medicine & international health* 2020;25(3):278.
7. World Health Organisation. Global Health Observatory Data Repository Geneva: WHO; 2020 [cited 2020 10 May]. Available from: <https://apps.who.int/gho/data/node.home> accessed 10 May 2020.
8. World Health Organisation. 2018 Global Reference List of 100 Core Health Indicators (plus health-related SDGs). Geneva: WHO; 2018 [cited 2020 30 March]. Available from: <https://www.who.int/healthinfo/indicators/2018/en/> accessed 30 Mach 2020.
9. Worldometer. Covid-19 Coronavirus Pandemic: Worldometer; 2020 [cited 2020 10 May]. Available from: <https://www.worldometers.info/coronavirus/> accessed 10 May 2020.
10. WHO. Global reference list of 100 core health indicators. Accessed on 02 July 2018 at <https://www.who.int/healthinfo/indicators/2018/en/>, 2018.
11. WHO. Global recommendations on physical activity for health. Accessed on 17June2020 at [https://apps.who.int/iris/bitstream/handle/10665/44399/9789241599979\\_eng.pdf;jsessionid=8870764033B6B16FCA9C9279A83A2B66?sequence=1](https://apps.who.int/iris/bitstream/handle/10665/44399/9789241599979_eng.pdf;jsessionid=8870764033B6B16FCA9C9279A83A2B66?sequence=1), 2010.
12. UNICEF W. Capture the Moment – Early initiation of breastfeeding: The best start for every newborn. Accessed on 17 June 2020 at [https://www.unicef.org/publications/files/UNICEF\\_WHO\\_Capture\\_the\\_moment\\_EIBF\\_2018.pdf](https://www.unicef.org/publications/files/UNICEF_WHO_Capture_the_moment_EIBF_2018.pdf). 2018
13. WHO. Healthy life expectancy (HALE) at birth. Accessed on 17June2020 at [https://www.who.int/gho/mortality\\_burden\\_disease/life\\_tables/hale\\_text/en/](https://www.who.int/gho/mortality_burden_disease/life_tables/hale_text/en/) 2020.
14. Nkengasong JN, Mankoula W. Looming threat of COVID-19 infection in Africa: act collectively, and fast. *Lancet (London, England)* 2020;395(10227):841-42. doi: 10.1016/S0140-6736(20)30464-5 [published Online First: 2020/03/03]
15. Paintsill E. COVID-19 threatens health systems in sub-Saharan Africa: the eye of the crocodile. *The Journal of Clinical Investigation* 2020;130(6):2741-44.
16. Gilbert M, Pullano G, Pinotti F, et al. Preparedness and vulnerability of African countries against importations of COVID-19: a modelling study. *Lancet (London,*

- 1  
2  
3  
4 *England* 2020;395(10227):871-77. doi: 10.1016/S0140-6736(20)30411-6  
5 [published Online First: 2020/02/24]  
6  
7 17. Thompson JK, Jarvie GJ, Lahey BB, et al. Exercise and obesity: etiology,  
8 physiology, and intervention. *Psychol Bull* 1982;91(1):55-79. [published Online  
9 First: 1982/01/01]  
10  
11 18. Dietz W, Santos-Burgoa C. Obesity and its Implications for COVID-19 Mortality.  
12 *Obesity (Silver Spring)* 2020;28(6):1005. doi: 10.1002/oby.22818 [published  
13 Online First: 2020/04/03]  
14  
15 19. Palaiodimos L, Kokkinidis DG, Li W, et al. Severe obesity, increasing age and male  
16 sex are independently associated with worse in-hospital outcomes, and higher  
17 in-hospital mortality, in a cohort of patients with COVID-19 in the Bronx, New  
18 York. *Metabolism* 2020;108:154262. doi: 10.1016/j.metabol.2020.154262  
19 [published Online First: 2020/05/19]  
20  
21 20. Binns C, Lee M, Low WY. The Long-Term Public Health Benefits of Breastfeeding.  
22 *Asia Pac J Public Health* 2016;28(1):7-14. doi: 10.1177/1010539515624964  
23 [published Online First: 2016/01/23]  
24  
25 21. WHO. Long-term effects of breastfeeding. Accessed on 17 June 2020 at  
26 [https://apps.who.int/iris/bitstream/handle/10665/79198/9789241505307\\_eng.pdf?](https://apps.who.int/iris/bitstream/handle/10665/79198/9789241505307_eng.pdf?sequence=1)  
27 [sequence=1](https://apps.who.int/iris/bitstream/handle/10665/79198/9789241505307_eng.pdf?sequence=1). 2013  
28  
29 22. WHO. International health regulations. Accessed on 19th June 2020 at  
30 [https://apps.who.int/iris/bitstream/handle/10665/43883/9789241580410\\_eng.pdf;](https://apps.who.int/iris/bitstream/handle/10665/43883/9789241580410_eng.pdf;jsessionid=712C63BFFB04F0AAAEC15142D7B46A89?sequence=1)  
31 [jsessionid=712C63BFFB04F0AAAEC15142D7B46A89?sequence=1](https://apps.who.int/iris/bitstream/handle/10665/43883/9789241580410_eng.pdf;jsessionid=712C63BFFB04F0AAAEC15142D7B46A89?sequence=1), 2005.  
32  
33  
34  
35  
36  
37  
38  
39  
40  
41  
42  
43  
44  
45  
46  
47  
48  
49  
50  
51  
52  
53  
54  
55  
56  
57  
58  
59  
60

**Table 1: Descriptive summary of key health system indicators for African countries**

| <u>Variables</u>                                                               | <u>Number of countries</u> | <u>Median (IQR)</u>  | <u>Minimum-Maximum</u> |
|--------------------------------------------------------------------------------|----------------------------|----------------------|------------------------|
| Cummulative COVID-19 deaths                                                    | 53                         | 12.0 (3.0-49.0)      | 0.0- 1088.0            |
| Cummulative COVID-19 deaths per million                                        | 53                         | 2.0 (0.2-6.0)        | 0.0-55.0               |
| Cummulative COVID-19 cases                                                     | 53                         | 820.0 (295.0-2216.0) | 0.0- 37525.0           |
| Cummulative COVID-19 cases per million                                         | 53                         | 63.0 (17.0-243.0)    | 0.0-3987.0             |
| Current health expenditure (CHE) as percentage of gross domestic product (GDP) | 52                         | 5.3 (3.9-6.9)        | 2.8-13.4               |
| BCG immunization coverage among 1-year-olds (%)                                | 52                         | 91.5 (84.0-96.5)     | 52.0-99.0              |
| Early initiation of breastfeeding (%)                                          | 46                         | 51.4 (35.7-65.3)     | 23.0-93.1              |
| Life expectancy at birth (years)                                               | 52                         | 63.2 (59.8-66.1)     | 52.9-76.4              |
| Healthy life expectancy (HALE) at birth (years)                                | 52                         | 55.7 (52.3-57.9)     | 44.9-66.3              |
| Medical doctors (per 10 000 population)                                        | 51                         | 1.6 (0.8-4.0)        | 0.1-25.3               |
| Nursing and midwifery personnel (per 10 000 population)                        | 51                         | 8.8 (4.4-15.5)       | 0.1-80.8               |
| Hospital beds (per 10 000 population)                                          | 51                         | 10.0 (5.0-18.0)      | 1.0-36.0               |
| UHC index of service coverage (SCI)                                            | 52                         | 0.5 (0.4-0.5)        | 0.3-0.8                |
| Prevalence of insufficient physical activity among adults aged 18+ years       | 45                         | 22.1 (15.4-28.0)     | 5.5-41.3               |
| Prevalence of overweight among adults                                          | 51                         | 28.9 (26.2-36.8)     | 20.9-63.5              |
| Incidence of tuberculosis (per 100 000 population per year)                    | 52                         | 175.0 (79.0-303.0)   | 12.0-611.0             |
| Prevalence of HIV among adults aged 15 to 49 (%)                               | 50                         | 1.6 (0.7-4.6)        | 0.1-27.3               |



**Table 2: Risk factors for COVID-19 deaths and cases per million**

| <u>Variables</u>                                                               | <u>Univariate</u>        |                | <u>Multivariate</u>      |                  |
|--------------------------------------------------------------------------------|--------------------------|----------------|--------------------------|------------------|
|                                                                                | <u>Beta (Std. Error)</u> | <u>p-value</u> | <u>Beta (Std. Error)</u> | <u>p-value</u>   |
| <b>a) <u>Sub-Saharan Africa</u></b>                                            |                          |                |                          |                  |
| <b>Risk factors for deaths</b>                                                 |                          |                |                          |                  |
| BCG immunization coverage among 1-year-olds (%)                                | -0.0302 (0.0189)         | 0.1106         | -0.0293 (0.0191)         | 0.1242           |
| Nursing and midwifery personnel (per 10 000 population)                        | -0.0324 (0.0343)         | 0.3467         | -0.0426 (0.0178)         | <b>0.0171</b>    |
| UHC index of service coverage (SCI)                                            | 4.8486 (1.7709)          | 0.0062         | 4.7049 (2.3268)          | <b>0.0432</b>    |
| Prevalence of insufficient physical activity among adults aged 18+ years       | 0.1201 (0.0243)          | <.0001         | 0.0830 (0.0333)          | <b>0.0127</b>    |
| <b>Risk factors for cases per million</b>                                      |                          |                |                          |                  |
| Early initiation of breastfeeding (%)                                          | -0.0534 (0.0143)         | 0.0002         | -0.0563 (0.0136)         | <b>&lt;.0001</b> |
| Healthy life expectancy (HALE) at birth (years)                                | 0.0917 (0.0410)          | 0.0251         | 0.0870 (0.0415)          | <b>0.0373</b>    |
| Prevalence of overweight among adults                                          | 0.0958 (0.0390)          | 0.0140         | 0.0417 (0.0340)          | 0.2214           |
| <b>b) <u>All the African countries</u></b>                                     |                          |                |                          |                  |
| <b>Risk factors for deaths (all countries)</b>                                 |                          |                |                          |                  |
| Early initiation of breastfeeding (%)                                          | -0.0437 (0.0183)         | 0.0205         | -0.0514 (0.0171)         | <b>0.0027</b>    |
| Healthy life expectancy (HALE) at birth (years)                                | 0.0865 (0.0465)          | 0.0626         | 0.1059 (0.0483)          | <b>0.0285</b>    |
| <b>Risk factors for cases per million (all countries)</b>                      |                          |                |                          |                  |
| Current health expenditure (CHE) as percentage of gross domestic product (GDP) | -0.1913 (0.0896)         | 0.0328         | -0.1739 (0.0845)         | <b>0.0397</b>    |
| Early initiation of breastfeeding (%)                                          | -0.0476 (0.0169)         | 0.0049         | -0.0460 (0.0167)         | <b>0.0061</b>    |

**Revised Standards for Quality Improvement Reporting Excellence (SQUIRE 2.0)  
September 15, 2015**

| <b>Text Section and Item Name</b> | <b>Section or Item Description</b>                                                                                                                                                                                                                                                                                                                                                                                                                                                                                                                                                                                                                                                                                                                                                                                                                                                                                                                                                                      |                                                                                                    |
|-----------------------------------|---------------------------------------------------------------------------------------------------------------------------------------------------------------------------------------------------------------------------------------------------------------------------------------------------------------------------------------------------------------------------------------------------------------------------------------------------------------------------------------------------------------------------------------------------------------------------------------------------------------------------------------------------------------------------------------------------------------------------------------------------------------------------------------------------------------------------------------------------------------------------------------------------------------------------------------------------------------------------------------------------------|----------------------------------------------------------------------------------------------------|
| <b>Notes to authors</b>           | <ul style="list-style-type: none"> <li>• The SQUIRE guidelines provide a framework for reporting new knowledge about how to improve healthcare</li> <li>• The SQUIRE guidelines are intended for reports that describe system level work to improve the quality, safety, and value of healthcare, and used methods to establish that observed outcomes were due to the intervention(s).</li> <li>• A range of approaches exists for improving healthcare. SQUIRE may be adapted for reporting any of these.</li> <li>• Authors should consider every SQUIRE item, but it may be inappropriate or unnecessary to include every SQUIRE element in a particular manuscript.</li> <li>• The SQUIRE Glossary contains definitions of many of the key words in SQUIRE.</li> <li>• The Explanation and Elaboration document provides specific examples of well-written SQUIRE items, and an in-depth explanation of each item.</li> <li>• Please cite SQUIRE when it is used to write a manuscript.</li> </ul> |                                                                                                    |
| <b>Title and Abstract</b>         |                                                                                                                                                                                                                                                                                                                                                                                                                                                                                                                                                                                                                                                                                                                                                                                                                                                                                                                                                                                                         |                                                                                                    |
| <b>1. Title</b>                   | Indicate that the manuscript concerns an initiative to improve healthcare (broadly defined to include the quality, safety, effectiveness, patient-centeredness, timeliness, cost, efficiency, and equity of healthcare)                                                                                                                                                                                                                                                                                                                                                                                                                                                                                                                                                                                                                                                                                                                                                                                 | Yes                                                                                                |
| <b>2. Abstract</b>                | <p>a. Provide adequate information to aid in searching and indexing</p> <p>b. Summarize all key information from various sections of the text using the abstract format of the intended publication or a structured summary such as:<br/>background, local problem, methods, interventions,</p>                                                                                                                                                                                                                                                                                                                                                                                                                                                                                                                                                                                                                                                                                                         | <p>Adequate information searching and indexing included</p> <p>Summarized as per the checklist</p> |



1  
2  
3  
4  
5  
6  
7  
8  
9  
10  
11  
12  
13  
14  
15  
16  
17  
18  
19  
20  
21  
22  
23  
24  
25  
26  
27  
28  
29  
30  
31  
32  
33  
34  
35  
36  
37  
38  
39  
40  
41  
42  
43  
44  
45  
46  
47  
48  
49  
50  
51  
52  
53  
54  
55  
56  
57  
58  
59  
60

|  |                      |  |
|--|----------------------|--|
|  | results, conclusions |  |
|--|----------------------|--|

For peer review only

| Introduction                           | <i>Why did you start?</i>                                                                                                                                                                                                                                                                                                                                                                                        |                                                                                                       |
|----------------------------------------|------------------------------------------------------------------------------------------------------------------------------------------------------------------------------------------------------------------------------------------------------------------------------------------------------------------------------------------------------------------------------------------------------------------|-------------------------------------------------------------------------------------------------------|
| <b>3. Problem Description</b>          | Nature and significance of the local problem                                                                                                                                                                                                                                                                                                                                                                     | Well described                                                                                        |
| <b>4. Available knowledge</b>          | Summary of what is currently known about the problem, including relevant previous studies                                                                                                                                                                                                                                                                                                                        | Done                                                                                                  |
| <b>5. Rationale</b>                    | Informal or formal frameworks, models, concepts, and/or theories used to explain the problem, any reasons or assumptions that were used to develop the intervention(s), and reasons why the intervention(s) was expected to work                                                                                                                                                                                 | Rationale is presented                                                                                |
| <b>6. Specific aims</b>                | Purpose of the project and of this report                                                                                                                                                                                                                                                                                                                                                                        | Presented                                                                                             |
| Methods                                | <i>What did you do?</i>                                                                                                                                                                                                                                                                                                                                                                                          |                                                                                                       |
| <b>7. Context</b>                      | Contextual elements considered important at the outset of introducing the intervention(s)                                                                                                                                                                                                                                                                                                                        | Yes this is presented                                                                                 |
| <b>8. Intervention(s)</b>              | a. Description of the intervention(s) in sufficient detail that others could reproduce it<br>b. Specifics of the team involved in the work                                                                                                                                                                                                                                                                       | Sufficient detail is provided<br>Specifics of the team provided                                       |
| <b>9. Study of the Intervention(s)</b> | a. Approach chosen for assessing the impact of the intervention(s)<br>b. Approach used to establish whether the observed outcomes were due to the intervention(s)                                                                                                                                                                                                                                                | N/A                                                                                                   |
| <b>10. Measures</b>                    | a. Measures chosen for studying processes and outcomes of the intervention(s), including rationale for choosing them, their operational definitions, and their validity and reliability<br>b. Description of the approach to the ongoing assessment of contextual elements that contributed to the success, failure, efficiency, and cost<br>c. Methods employed for assessing completeness and accuracy of data | a) and b) not applicable<br>Part C: Methods assessing completeness and accuracy of data are presented |
| <b>11. Analysis</b>                    | a. Qualitative and quantitative methods used to draw inferences from the data<br>b. Methods for understanding variation within the data, including the effects of time as a variable                                                                                                                                                                                                                             | Detailed analysis process is presented                                                                |
| <b>12. Ethical</b>                     | Ethical aspects of implementing and studying the intervention(s) and how they were addressed, including, but                                                                                                                                                                                                                                                                                                     | N/A                                                                                                   |

1  
2  
3  
4  
5  
6  
7  
8  
9  
10  
11  
12  
13  
14  
15  
16  
17  
18  
19  
20  
21  
22  
23  
24  
25  
26  
27  
28  
29  
30  
31  
32  
33  
34  
35  
36  
37  
38  
39  
40  
41  
42  
43  
44  
45  
46  
47  
48  
49  
50  
51  
52  
53  
54  
55  
56  
57  
58  
59  
60

|                       |                                                                            |  |
|-----------------------|----------------------------------------------------------------------------|--|
| <b>Considerations</b> | not limited to, formal ethics review and potential conflict(s) of interest |  |
|-----------------------|----------------------------------------------------------------------------|--|

For peer review only

| Results                   | <i>What did you find?</i>                                                                                                                                                                                                                                                                                                                                                                                                                                                                                                                                                                                     |                                                                                                                                                                                         |
|---------------------------|---------------------------------------------------------------------------------------------------------------------------------------------------------------------------------------------------------------------------------------------------------------------------------------------------------------------------------------------------------------------------------------------------------------------------------------------------------------------------------------------------------------------------------------------------------------------------------------------------------------|-----------------------------------------------------------------------------------------------------------------------------------------------------------------------------------------|
| <b>13. Results</b>        | <p>a. Initial steps of the intervention(s) and their evolution over time (<i>e.g.</i>, time-line diagram, flow chart, or table), including modifications made to the intervention during the project</p> <p>b. Details of the process measures and outcome</p> <p>c. Contextual elements that interacted with the intervention(s)</p> <p>d. Observed associations between outcomes, interventions, and relevant contextual elements</p> <p>e. Unintended consequences such as unexpected benefits, problems, failures, or costs associated with the intervention(s).</p> <p>f. Details about missing data</p> | <p>The results are presented in sufficient detail as achieved with the methods applied</p> <p>Associations are presented and described</p> <p>We clarify how we handle missing data</p> |
| Discussion                | <i>What does it mean?</i>                                                                                                                                                                                                                                                                                                                                                                                                                                                                                                                                                                                     |                                                                                                                                                                                         |
| <b>14. Summary</b>        | <p>a. Key findings, including relevance to the rationale and specific aims</p> <p>b. Particular strengths of the project</p>                                                                                                                                                                                                                                                                                                                                                                                                                                                                                  | <p>We present key findings in relation to the specific aims and context</p>                                                                                                             |
| <b>15. Interpretation</b> | <p>a. Nature of the association between the intervention(s) and the outcomes</p> <p>b. Comparison of results with findings from other publications</p> <p>c. Impact of the project on people and systems</p> <p>d. Reasons for any differences between observed and anticipated outcomes, including the influence of context</p> <p>e. Costs and strategic trade-offs, including opportunity costs</p>                                                                                                                                                                                                        | <p>We have interpreted our findings and put them in context</p>                                                                                                                         |
| <b>16. Limitations</b>    | <p>a. Limits to the generalizability of the work</p> <p>b. Factors that might have limited internal validity such as confounding, bias, or imprecision in the design,</p>                                                                                                                                                                                                                                                                                                                                                                                                                                     | <p>We present the limitations of our study in detail</p> <p>The strength of the</p>                                                                                                     |

|                          |                                                                                                                                                                                                                  |                                                                               |
|--------------------------|------------------------------------------------------------------------------------------------------------------------------------------------------------------------------------------------------------------|-------------------------------------------------------------------------------|
|                          | <p>methods, measurement, or analysis</p> <p>c. Efforts made to minimize and adjust for limitations</p>                                                                                                           | <p>statistical method used is highlighted in this section</p>                 |
| <b>17. Conclusions</b>   | <p>a. Usefulness of the work</p> <p>b. Sustainability</p> <p>c. Potential for spread to other contexts</p> <p>d. Implications for practice and for further study in the field</p> <p>e. Suggested next steps</p> | <p>This section was written in detail and covers points a) and d) and e).</p> |
| <b>Other information</b> |                                                                                                                                                                                                                  |                                                                               |
| <b>18. Funding</b>       | <p>Sources of funding that supported this work. Role, if any, of the funding organization in the design, implementation, interpretation, and reporting</p>                                                       | <p>We provide a funding statement</p>                                         |

# BMJ Open

## Factors associated with COVID-19 infections and mortality in Africa: A cross-sectional study using publicly available data

|                                 |                                                                                                                                                                                                                                                                                                                                             |
|---------------------------------|---------------------------------------------------------------------------------------------------------------------------------------------------------------------------------------------------------------------------------------------------------------------------------------------------------------------------------------------|
| Journal:                        | <i>BMJ Open</i>                                                                                                                                                                                                                                                                                                                             |
| Manuscript ID                   | bmjopen-2020-042750.R1                                                                                                                                                                                                                                                                                                                      |
| Article Type:                   | Original research                                                                                                                                                                                                                                                                                                                           |
| Date Submitted by the Author:   | 01-Sep-2020                                                                                                                                                                                                                                                                                                                                 |
| Complete List of Authors:       | Okeahalam, Charles; University of the Witwatersrand, School of Economics and Finance, Faculty of Commerce<br>Williams, Victor; University of the Witwatersrand, School of Public Health, Faculty of Health Sciences<br>Otwombe, Kennedy; University of the Witwatersrand Perinatal HIV Research Unit, Statistics and Data Management Centre |
| <b>Primary Subject Heading</b>: | Epidemiology                                                                                                                                                                                                                                                                                                                                |
| Secondary Subject Heading:      | Epidemiology, Global health, Infectious diseases, Public health                                                                                                                                                                                                                                                                             |
| Keywords:                       | COVID-19, EPIDEMIOLOGY, PUBLIC HEALTH, STATISTICS & RESEARCH METHODS                                                                                                                                                                                                                                                                        |
|                                 |                                                                                                                                                                                                                                                                                                                                             |

SCHOLARONE™  
Manuscripts



I, the Submitting Author has the right to grant and does grant on behalf of all authors of the Work (as defined in the below author licence), an exclusive licence and/or a non-exclusive licence for contributions from authors who are: i) UK Crown employees; ii) where BMJ has agreed a CC-BY licence shall apply, and/or iii) in accordance with the terms applicable for US Federal Government officers or employees acting as part of their official duties; on a worldwide, perpetual, irrevocable, royalty-free basis to BMJ Publishing Group Ltd ("BMJ") its licensees and where the relevant Journal is co-owned by BMJ to the co-owners of the Journal, to publish the Work in this journal and any other BMJ products and to exploit all rights, as set out in our [licence](#).

The Submitting Author accepts and understands that any supply made under these terms is made by BMJ to the Submitting Author unless you are acting as an employee on behalf of your employer or a postgraduate student of an affiliated institution which is paying any applicable article publishing charge ("APC") for Open Access articles. Where the Submitting Author wishes to make the Work available on an Open Access basis (and intends to pay the relevant APC), the terms of reuse of such Open Access shall be governed by a Creative Commons licence – details of these licences and which [Creative Commons](#) licence will apply to this Work are set out in our licence referred to above.

Other than as permitted in any relevant BMJ Author's Self Archiving Policies, I confirm this Work has not been accepted for publication elsewhere, is not being considered for publication elsewhere and does not duplicate material already published. I confirm all authors consent to publication of this Work and authorise the granting of this licence.

1  
2  
3  
4 **Title: Factors associated with COVID-19 infections and mortality in Africa: A**  
5 **cross-sectional study using publicly available data**  
6

7 **Charles Okeahalam<sup>1</sup>, Victor Williams<sup>2</sup>, Kennedy Otwombe<sup>2,3</sup>**

8 <sup>1</sup>School of Economics and Finance, Faculty of Commerce, University of the Witwatersrand

9 <sup>2</sup>School of Public Health, Faculty of Health Sciences, University of the Witwatersrand

10 <sup>3</sup>Perinatal HIV Research Unit, Faculty of Health Sciences, University of the Witwatersrand

11 Corresponding author: [otwombek@phru.co.za](mailto:otwombek@phru.co.za)

12  
13  
14 **Abstract**

15 **Introduction**

16 The current COVID-19 pandemic is a global threat. This elicits questions on the level of  
17 preparedness and capacity of health systems to respond to emergencies relative to  
18 other parts of the world.

19 **Methods**

20 This cross-sectional study uses publicly available core health data for 53 African  
21 countries, to determine risk factors for cumulative COVID-19 deaths and cases per  
22 million in all countries in the continent. Descriptive statistics were determined for the  
23 indicators and a negative binomial regression was used for modelling the risk factors.

24 **Results**

25 In Sub-Saharan Africa, an increase in the number of nursing and midwifery personnel  
26 decreased the risk of COVID-19 deaths ( $p=0.0178$ ) while a unit increase in universal  
27 health care (UHC) index of service coverage and prevalence of insufficient physical  
28 activity among adults increased the risk of COVID-19 deaths ( $p=0.0432$  and  $p=0.0127$ ).  
29 An increase in the proportion of infants initiating breastfeeding reduced the number of  
30 cases per million ( $p<0.0001$ ) while an increase in higher healthy life expectancy at birth  
31 increased the number of cases per million ( $p=0.0340$ ).

32 **Conclusion**

33 Despite its limited resources, Africa's preparedness and response to the COVID-19  
34 pandemic can be improved by identifying and addressing *specific* gaps in the funding of  
35 health services delivery. These gaps impact negatively on service delivery in Africa  
36 which requires more nursing personnel and increased UHC coverage to mitigate the  
37 effects of COVID-19.  
38  
39  
40  
41  
42  
43  
44  
45  
46  
47  
48  
49  
50  
51  
52  
53  
54  
55  
56  
57  
58  
59  
60



## **Article Summary**

### a. Strengths of the study:

- i. Innovative use of credible publicly available data which can easily be accessed and verified
- ii. Use of multiple imputation technique to address missing observations in the different variables.
- iii. Use of robust negative binomial regression analysis method which allows for modeling of over-dispersion in the data.

### b. Limitations of the study:

- i. Extracted data had missing observations which necessitated excluding some variables.
- ii. The methods used to impute for missing data may have overestimated the variance

## Introduction

In January 2020, the severe acute respiratory syndrome coronavirus 2 (SARS-CoV-2) popularly referred to as COVID-19 was identified as the cause of unknown pneumonia in Wuhan, China. Two months later, the World Health Organisation (WHO) classified COVID-19 as a pandemic. COVID-19 is a global health threat. Since March 2020, there has been a rapid increase in the number of cases globally. Globally, as of 30<sup>th</sup> August 2020, there have been 24,822,800 confirmed cases of COVID-19, including 838,360 deaths, reported to WHO.<sup>1 2</sup> In a bid to stop the virus from spreading, there has been a global restriction on several activities including travelling.<sup>3 4</sup> The economic impact of a global shutdown and pressure on frail health systems of many countries across the world presents great uncertainty for the remaining half of the year and the immediate future.

The United States of America, Brazil, the United Kingdom and countries in Western Europe notably Italy, Spain and France account for the highest number of COVID-19 cases and mortality.<sup>2</sup> With the possible exception of Brazil, these countries have advanced health systems, reliable epidemic surveillance and response systems and have been able to mobilize resources with which to respond. However, due to the sudden increase in demand for health personnel, test kits, emergency care equipment and personal protective equipment, the health systems of all affected countries have been put under significant strain. With varying efficacy, the affected countries have increased hospital facilities for critical cases, increased the daily number of tests to identify positive cases and increased provision of personal protective equipment (PPE) for health personnel.<sup>4 5</sup>

At present, in comparison to the United States of America (USA), and Europe, Africa has a lower number of cases and lower daily increase in infection. While this may seem an advantage, the WHO continues to express concern about the impact COVID-19 may have on Africa. This is because, from the perspective of capacity, African countries are in a parlous situation relative to Europe, North America and some parts of Asia. The health systems of many African countries have limited ability to roll out widespread community screening and testing, few health personnel, and limited emergency facilities to manage critically ill COVID-19 patients<sup>6</sup>. The easing of restrictions on social and economic activities is likely to lead to a second wave of cases of COVID-19 in African countries. So with the best will and effort, African countries cannot use the same methodology to respond and contain the pandemic to the level of the developed countries that have performed badly, let alone to that of those that have performed well. If they are to use their limited capacity efficiently, it is imperative African countries clearly identify factors that will support that objective and institute effective evidence-based approaches to managing COVID-19. Accordingly, in a bid to support focus on efficient capacity development, this study analyzes the relationship between health indicators and COVID-19 deaths and cases in African countries. While the indicators were drawn from different thematic areas, our analysis was largely data driven. The analysis is conducted for sub-Saharan Africa (SSA) and entire continent since SSA is known to have a higher burden of disease.

## Methodology

This is a cross-sectional study of the most recent 2020 data for African countries extracted from the World Health Organisation Global Health Observatory Repository.<sup>7</sup> Before extraction, the research team reviewed available indicators in the 2018 Global Reference List of 100 Core Health Indicators (plus health-related SDGs)<sup>8</sup> and listed different indicators by thematic areas. These indicators directly or indirectly describe the potential ability of a country's health system to respond to the health needs of the population and may further determine the extent available services can be expanded to accommodate emergencies. Data on confirmed cases of coronavirus and deaths were obtained from the Worldometer Coronavirus Live Update.<sup>9</sup>

### Definition of variables

*BCG immunization coverage among 1-year olds (%)*: BCG immunization coverage among 1-year olds (%).<sup>10</sup>

*Nursing and midwifery personnel (per 10 000 population)*: It is the density of nurses and midwifery personnel per 10 000 people.<sup>10</sup>

*UHC index of service coverage*: Coverage of essential health services such as reproductive, maternal, newborn and child health amongst others.<sup>10</sup>

*Prevalence of insufficient physical activity among adults aged 18+ years*: Insufficient physical activity was defined as adults not meeting the WHO recommendations on physical activity for health i.e, at least 150 min of moderate-intensity, or 75 min of vigorous-intensity physical activity per week, or any equivalent combination of the two.<sup>11</sup>

*Early initiation of breastfeeding (%)*: Initiation of breastfeeding within the first hour of birth and exclusively breastfed for the first six months of life.<sup>12</sup>

*Healthy life expectancy at birth (years)*: This is a life expectancy estimate that applies disability weights to health states to compute the equivalent number of years of good health that a new born can expect.<sup>13</sup>

*Life expectancy at birth*: This reflects the overall mortality level of a population. It summarizes the mortality pattern that prevails across all age groups - children and adolescents, adults and the elderly.<sup>14</sup>

*Prevalence of overweight among adults*: Adults with a body mass index  $\geq 30$ .

*Current health expenditure (CHE) as a percentage of gross domestic product (GDP)*: This indicates the level of resources channelled to health relative to other uses.<sup>10</sup>

### **Statistical methodology**

Data for 32 indicators (or variables) from 12 thematic areas were extracted from the 2018 Global Reference List of 100 Core Health Indicators (Table 1). The 12 thematic areas are Mortality by Age and Sex, Mortality by Cause, Morbidity, Nutrition, Environmental Risk Factors, Non-Communicable Diseases, Immunization, Essential health services, Utilization and access, Health workforce, Health Information and Health financing.

Data were extracted in .xls format for each variable and imported into STATA 15.0 software (StataCorp LLC College Station, TX). For each variable, the most recent data

1  
2  
3  
4 for all countries included in the study were retained with the corresponding year and  
5 country name in .dta format. The different variables were merged using the country  
6 name as the unique identifier to obtain the final data set used for the analysis. The  
7 countries were further categorized into their assigned WHO region and World Bank  
8 income group except Somalia that had missing data.  
9

10  
11 All data on health indicators were continuous and were analysed descriptively using  
12 median, interquartile range (IQR) and minimum and maximum values.  
13

14  
15 Of the 53 countries included in the analyses, there were varying proportions of < 10%  
16 missing data. To address this, we assumed a missing at random mechanism and  
17 applied a multiple imputation technique with ten imputations and summarised the results  
18 across all the datasets.<sup>15</sup> The fit of the multiple imputation was evaluated using variance  
19 information measures including relative efficiency.  
20

21  
22 We reviewed the core indicators together with a clinician who advised on the more  
23 plausible ones to answer our hypothesis. The identified variables were subsequently  
24 subjected to various statistical approaches including testing for correlations and using  
25 variable selection regression procedures to arrive at the final list.  
26

27  
28 Due to its flexibility in allowing for overdispersion, risk factors for cumulative COVID-19  
29 deaths and cases per million were fitted using the negative binomial regression. Both  
30 univariate and multivariate regression models were fitted. In the multivariate model, a  
31 full model including all the variables was fitted and the final model determined using the  
32 backward selection procedure. Regression models were fitted for sub-Saharan Africa  
33 followed by a sensitivity analyses including all the countries in the continent. Model fit  
34 was assessed using the ratio of the deviance, scaled deviance, Pearson Chi-square  
35 and scaled Pearson Chi-square divided by the degrees of freedom. Additionally, we  
36 also assessed model fit using the cumulative sum of residual plots with 10 000  
37 replications. Deaths and cases per million were those reported in the Worldometer as of  
38 29<sup>th</sup> May 2020.  
39

40  
41 All statistical analyses were conducted using SAS Enterprise Guide 7.15 (SAS Institute  
42 Inc., NC, USA).  
43

## 44 **Results**

### 45 Characteristics

46  
47 A total of 53 countries from Africa were included in this analysis (Table 2). The  
48 median number of cumulative COVID-19 deaths across the African continent was 12  
49 (IQR: 3-49), cumulative deaths per million (2, IQR:0.2-6.0), cumulative COVID-19 cases  
50 [820, IQR: 295-2216], cumulative cases per million (63, IQR: 17.0-243.0), current health  
51 expenditure was 5.3 (IQR: 3.9-6.9) and BCG immunisation coverage in 1-year olds was  
52 91.5% (IQR: 84.0-96.5). The median life expectancy was 63.2 years (IQR: 59.8-66.1),  
53 healthy life expectancy 55.7 years (IQR: 52.3-57.9), medical doctors per 10 000  
54 population was 1.6 (IQR: 0.8-4.0), nursing and midwifery personnel per 10 000 was 8.8  
55  
56  
57  
58  
59  
60

(IQR: 4.4-15.5) and universal health care (UHC) index of service coverage 0.5 (IQR: 0.4-0.5).

### Risk factors for sub-Saharan Africa

#### Cumulative COVID-19 deaths

In the multivariate regression, modelling risk factors for COVID-19 deaths in sub-Saharan Africa and controlling for BCG immunization coverage, a unit increase in the number of nursing and midwifery personnel decreased the risk of death by 0.0426 ( $p=0.0178$ ) whereas a unit increase in the UHC index of service coverage and prevalence of insufficient physical activity among adults aged 18+ years increased the risk of COVID-19 deaths by 4.7049 ( $p=0.0432$ ) and 0.0830 ( $p=0.0127$ ) respectively (Table 3).

#### Cumulative Cases per Million

A unit increase in the proportion of infants initiating breastfeeding reduces the number of cases per million by 0.0563 ( $p<0.0001$ ) whereas an increase in higher healthy life expectancy at birth increases the number of COVID-19 cases per million by 0.0417 ( $p=0.0340$ ).

### Risk factors for all the African countries

#### Cumulative COVID-19 deaths

Early initiation of breastfeeding (Beta= -0.0514,  $p$ -value=0.0027) was associated with a lower risk of death whereas increasing healthy life expectancy at birth was associated with a higher risk of death (Beta=0.1059,  $p$ -value=0.0285).

#### Cumulative cases per million

An increase in the current health expenditure as a percentage of GDP (Beta=-0.1739,  $p$ -value=0.0397) and the percentage initiated early on breastfeeding (Beta=-0.0460,  $p$ -value=0.0061) was associated with a decrease in cases of COVID-19 per million (Table 3).

In the multiple imputation estimations, the relative efficiency of variables where imputation was conducted ranged from 95% to 99% whereas the scaled deviance values for the regression models were within the acceptable range.

## **Discussion**

This study considers the factors associated with COVID-19 deaths and infection cases per million from 53 of 54 African countries. In summary, building health capacity by increasing the number of nursing and midwifery personnel will reduce COVID-19 deaths in sub-Saharan Africa. However, we also found that higher UHC index of service coverage and prevalence of insufficient physical activity in adults  $\geq 18$  years increases fatalities. Additionally, having a population with a high proportion of people where breastfeeding had been initiated early, provided protection. A higher healthy life expectancy increased the risk of cases. When evaluating all the African countries, the

1  
2  
3  
4 initiation of early breastfeeding was protective against death whereas higher healthy life  
5 expectancy increased the risk of death. We also find that an increase in current health  
6 expenditure levels provide additional protection against COVID-19 infections.  
7

8  
9 Delving deeper into our results, the finding that an increase in the number of nursing  
10 and midwifery personnel reduced the risk of COVID-19 related mortality in sub-Saharan  
11 Africa echo findings from other parts of the world where the benefits of preparedness  
12 and available capacity has been shown to confer benefits in the management and care  
13 of patients.<sup>16 17</sup> Where capacity shortages exist in the health sector, there is potential for  
14 poor outcomes in the management and care of COVID-19 patients. Major gaps still exist  
15 in the implementation of the WHO International Health Regulations, notably increasing  
16 capacity of hospitals and appropriate injection of financial resources.<sup>17</sup> The results  
17 confirm the point made earlier that unlike the other COVID-19 affected parts of the  
18 world, Africa has less capacity to handle a major outbreak of COVID-19. Therefore,  
19 African governments need to strengthen the overall health care systems and in doing  
20 so, specific focus needs to be placed on enhancing human resource capacity such as  
21 nurses, medical doctors and laboratory personnel.  
22  
23

24  
25 Our findings also illustrate that a higher UHC index of service coverage increases the  
26 risk of fatalities. While counter-intuitive, this may be driven by the countries in  
27 sub-Saharan Africa with the largest economies that have also had the largest number of  
28 cases and mortality: South Africa and Nigeria. A large number of people from these two  
29 countries travel internationally, in particular to Europe and it is likely that they have  
30 contracted the disease there and have imported it back into their countries.<sup>18</sup> To assess  
31 the robustness of this finding, we conducted a sensitivity analysis by removing the data  
32 on South Africa and Nigeria and re-estimated the model. No major differences relative  
33 to the first regression were observed suggesting that importation of infections similarly  
34 occurred in other sub-Saharan African countries.  
35  
36

37  
38 Additionally, that cohort of the population that travels internationally is generally able to  
39 afford COVID-19 test kits and conduct more tests. Testing is a critical requirement for  
40 effective management of COVID-19. From a statistical perspective, testing identifies  
41 cases which may be managed before getting severe resulting in deaths. This increases  
42 the number of observations on deaths. This view is similar to that reported in a previous  
43 paper on the vulnerability of African countries to COVID-19 and their preparedness to  
44 mitigate.<sup>18</sup>  
45

46  
47 More intuitively, we find that insufficient physical activity among adults aged 18+ years  
48 increased the risk of COVID-19 mortality. It is well documented in the literature that the  
49 lack of physical activity increases the risk of obesity.<sup>19</sup> Recent publications on  
50 COVID-19 related mortality, have shown that obesity elevates the risk of mortality.<sup>20 21</sup>  
51 Physical inactivity has long been recognized as a risk factor for non-communicable  
52 diseases which is a known cause of mortality globally (1, 2).<sup>22 23</sup> Early studies since the  
53 onset of the COVID-19 outbreak in China indicated elderly patients and those with  
54 co-morbidities particularly diabetes, hypertension and chronic respiratory diseases were  
55 at increased risk of mortality from COVID-19 (3, 4).<sup>24 25</sup> Therefore, the finding of  
56  
57  
58  
59  
60



1  
2  
3  
4 insufficient physical activity as a risk factor for death from our study is consistent with  
5 earlier studies (1).<sup>23</sup> Similarly, immunization has proved effective in prevention of  
6 different types of infectious diseases globally while breastfeeding provides babies with  
7 essential nutrients and antibodies to help prevent infections early in life. Hence,  
8 establishment of expanded program on immunization (EPI) and programs to encourage  
9 breastfeeding globally. Thus we postulate that the population of Africans aged 18+  
10 years who do not undertake sufficient physical activity may be similarly at high risk of  
11 mortality.  
12  
13

14 We also found that where a large population is exposed to early initiation of  
15 breastfeeding, there was protection against COVID-19 infection. Research on the  
16 long-term benefits of breastfeeding is growing and recent evidence suggests a  
17 protective effect against some chronic diseases in adulthood.<sup>26 27</sup> It may be that this  
18 protective effect extends to non-severe cases of COVID-19.  
19  
20

21 Further, in sub-Saharan Africa and all the African countries combined, higher healthy  
22 life expectancy (life expectancy that accounts for disabilities) in this study was  
23 associated with a higher risk of COVID-19 infection. Our findings are in tandem with  
24 previously published work on risk factors for COVID-19 infection from around the world  
25 that have shown older people are at higher risk for COVID-19 infection. Being older is  
26 associated with lower immunity and inflammatory reactions and a higher risk of  
27 comorbidities such as diabetes and hypertension amongst others. Such factors  
28 predispose older cohorts of the population to COVID-19 infection.  
29  
30

31 This study is not without limitations. The data used was sourced from publicly available  
32 repositories and therefore we had no control in sampling, study design and data  
33 collection processes. The study we conducted is cross-sectional and therefore cannot  
34 deduce causality. Since COVID-19 statistics are updated on a daily basis, the findings  
35 we report may vary with updated data. Despite these challenges, we applied robust  
36 statistical analysis methods to alleviate potential biases.  
37  
38

39 In conclusion, our study findings showed a relationship between COVID-19 cases and  
40 deaths with health capacity, breast feeding, life expectancy (as a proxy for age) and  
41 healthcare funding. Timely identification of the key evidence-based factors that might  
42 mitigate COVID-19 infections and deaths in Africa is pertinent for better management of  
43 the current and future pandemics. This may include investing in healthcare capacity  
44 building, infrastructure, disease surveillance, public health laboratories and all other  
45 aspects that relate to health as elucidated in the WHO International Health  
46 Regulations.<sup>28</sup>  
47  
48  
49  
50  
51  
52  
53  
54  
55  
56  
57  
58  
59  
60

### Patient and public involvement

This study utilised publicly available health indicators and aggregated COVID-19 cases and deaths. No patients were involved.

### Funding

No funding was available for this study.

### Contributorship Statement

CO developed the initial research concept, developing the hypothesis and methodology. VW did the data extraction and merging of the different data sets. KO participated in developing the hypothesis and conducted the data analysis. All the authors participated in interpreting the results and writing the manuscript.

### Data sharing statement

Data used for the analysis in this manuscript is publicly available and can be accessed at the referenced websites. Further enquiries and requests for the data used in this paper can be made through sending an email to [otwombek@phru.co.za](mailto:otwombek@phru.co.za).

### Ethics, Funding and Data Sharing

1. This study did not require ethical clearance as the data used for analysis is publicly available. Precautions were, however, adopted to document steps taken during data extraction, cleaning and analysis.
2. This manuscript did not receive funding from any organization and the authors declare no competing interest.

### Dryad identifier

doi:10.5061/dryad.cnp5hqc2r

### Licence Statement

I, the Submitting Author has the right to grant and does grant on behalf of all authors of the Work (as defined in the below author licence), an exclusive licence and/or a non-exclusive licence for contributions from authors who are: i) UK Crown employees; ii) where BMJ has agreed a CC-BY licence shall apply, and/or iii) in accordance with the terms applicable for US Federal Government officers or employees acting as part of their official duties; on a worldwide, perpetual, irrevocable, royalty-free basis to BMJ Publishing Group Ltd ("BMJ") its licensees and where the relevant Journal is co-owned by BMJ to the co-owners of the Journal, to publish the Work in BMJ Open and any other BMJ products and to exploit all rights, as set out in our licence.



## References

1. Huang R, Xia J, Chen Y, et al. A family cluster of SARS-CoV-2 infection involving 11 patients in Nanjing, China. *The Lancet Infectious Diseases* 2020;20(5):534-35.
2. World Health Organisation. Coronavirus Disease (COVID-19) Dashboard Geneva: WHO; 2020 [cited 2020 15 June]. Available from: <https://covid19.who.int/> accessed 15 June 2020.
3. World Health Organisation. Novel Coronavirus (2019-nCoV) SITUATION REPORT - 1. 21 January 2020 Geneva: WHO; 2020 [cited 2020 14 June]. Available from: [https://www.who.int/docs/default-source/coronaviruse/situation-reports/20200121-sitrep-1-2019-ncov.pdf?sfvrsn=20a99c10\\_4](https://www.who.int/docs/default-source/coronaviruse/situation-reports/20200121-sitrep-1-2019-ncov.pdf?sfvrsn=20a99c10_4) accessed 14 June 2020.
4. World Health O. Critical preparedness, readiness and response actions for COVID-19: interim guidance, 22 March 2020: World Health Organization, 2020.
5. Remuzzi A, Remuzzi G. COVID-19 and Italy: what next? *The Lancet* 2020;395(10231)
6. Velavan TP, Meyer CG. The COVID-19 epidemic. *Tropical medicine & international health* 2020;25(3):278.
7. World Health Organisation. Global Health Observatory Data Repository Geneva: WHO; 2020 [cited 2020 10 May]. Available from: <https://apps.who.int/gho/data/node.home> accessed 10 May 2020.
8. World Health Organisation. 2018 Global Reference List of 100 Core Health Indicators (plus health-related SDGs). Geneva: WHO; 2018 [cited 2020 30 March]. Available from: <https://www.who.int/healthinfo/indicators/2018/en/> accessed 30 Mach 2020.
9. Worldometer. Covid-19 Coronavirus Pandemic: Worldometer; 2020 [cited 2020 10 May]. Available from: <https://www.worldometers.info/coronavirus/> accessed 10 May 2020.
10. WHO. Global reference list of 100 core health indicators. Accessed on 02 July 2018 at <https://www.who.int/healthinfo/indicators/2018/en/>, 2018.
11. WHO. Global recommendations on physical activity for health. Accessed on 17June2020 at [https://apps.who.int/iris/bitstream/handle/10665/44399/9789241599979\\_eng.pdf;jsessionid=8870764033B6B16FCA9C9279A83A2B66?sequence=1](https://apps.who.int/iris/bitstream/handle/10665/44399/9789241599979_eng.pdf;jsessionid=8870764033B6B16FCA9C9279A83A2B66?sequence=1), 2010.
12. UNICEF W. Capture the Moment – Early initiation of breastfeeding: The best start for every newborn. Accessed on 17 June 2020 at [https://www.unicef.org/publications/files/UNICEF\\_WHO\\_Capture\\_the\\_moment\\_EIBF\\_2018.pdf](https://www.unicef.org/publications/files/UNICEF_WHO_Capture_the_moment_EIBF_2018.pdf). 2018
13. WHO. Healthy life expectancy (HALE) at birth. Accessed on 17June2020 at [https://www.who.int/gho/mortality\\_burden\\_disease/life\\_tables/hale\\_text/en/](https://www.who.int/gho/mortality_burden_disease/life_tables/hale_text/en/) 2020 [
14. WHO. Definitions and metadata. Accessed on 27th August 2020 at <https://www.who.int/whosis/whostat2006DefinitionsAndMetadata.pdf> 2006 [
15. Little RJA, Rubin DB. Statistical analysis with missing data. Hoboken, New Jersey: John Wiley & Sons Inc 2002.

16. Nkengasong JN, Mankoula W. Looming threat of COVID-19 infection in Africa: act collectively, and fast. *Lancet (London, England)* 2020;395(10227):841-42. doi: 10.1016/S0140-6736(20)30464-5 [published Online First: 2020/03/03]
17. Paintsill E. COVID-19 threatens health systems in sub-Saharan Africa: the eye of the crocodile. *The Journal of Clinical Investigation* 2020;130(6):2741-44.
18. Gilbert M, Pullano G, Pinotti F, et al. Preparedness and vulnerability of African countries against importations of COVID-19: a modelling study. *Lancet (London, England)* 2020;395(10227):871-77. doi: 10.1016/S0140-6736(20)30411-6 [published Online First: 2020/02/24]
19. Thompson JK, Jarvie GJ, Lahey BB, et al. Exercise and obesity: etiology, physiology, and intervention. *Psychol Bull* 1982;91(1):55-79. [published Online First: 1982/01/01]
20. Dietz W, Santos-Burgoa C. Obesity and its Implications for COVID-19 Mortality. *Obesity (Silver Spring)* 2020;28(6):1005. doi: 10.1002/oby.22818 [published Online First: 2020/04/03]
21. Palaodimos L, Kokkinidis DG, Li W, et al. Severe obesity, increasing age and male sex are independently associated with worse in-hospital outcomes, and higher in-hospital mortality, in a cohort of patients with COVID-19 in the Bronx, New York. *Metabolism* 2020;108:154262. doi: 10.1016/j.metabol.2020.154262 [published Online First: 2020/05/19]
22. Reiner M, Niermann C, Jekauc D, et al. Long-term health benefits of physical activity--a systematic review of longitudinal studies. *BMC Public Health* 2013;13:813. doi: 10.1186/1471-2458-13-813 [published Online First: 2013/09/10]
23. Rezende LFM, Garcia LMT, Mielke GI, et al. Physical activity and preventable premature deaths from non-communicable diseases in Brazil. *J Public Health (Oxf)* 2019;41(3):e253-e60. doi: 10.1093/pubmed/fdy183 [published Online First: 2018/10/23]
24. Jordan RE, Adab P, Cheng KK. Covid-19: risk factors for severe disease and death. *BMJ* 2020;368:m1198. doi: 10.1136/bmj.m1198 [published Online First: 2020/03/29]
25. Zhou F, Yu T, Du R, et al. Clinical course and risk factors for mortality of adult inpatients with COVID-19 in Wuhan, China: a retrospective cohort study. *Lancet (London, England)* 2020;395(10229):1054-62. doi: 10.1016/S0140-6736(20)30566-3 [published Online First: 2020/03/15]
26. Binns C, Lee M, Low WY. The Long-Term Public Health Benefits of Breastfeeding. *Asia Pac J Public Health* 2016;28(1):7-14. doi: 10.1177/1010539515624964 [published Online First: 2016/01/23]
27. WHO. Long-term effects of breastfeeding. Accessed on 17 June 2020 at [https://apps.who.int/iris/bitstream/handle/10665/79198/9789241505307\\_eng.pdf?sequence=1](https://apps.who.int/iris/bitstream/handle/10665/79198/9789241505307_eng.pdf?sequence=1). 2013
28. WHO. International health regulations. Accessed on 19th June 2020 at [https://apps.who.int/iris/bitstream/handle/10665/43883/9789241580410\\_eng.pdf;jsessionid=712C63BFFB04F0AAAEC15142D7B46A89?sequence=1](https://apps.who.int/iris/bitstream/handle/10665/43883/9789241580410_eng.pdf;jsessionid=712C63BFFB04F0AAAEC15142D7B46A89?sequence=1), 2005.

**Table 1: Summary of thematic areas of health indicators**

| Thematic Area              | Indicators used                                                                                                                                                |
|----------------------------|----------------------------------------------------------------------------------------------------------------------------------------------------------------|
| Mortality by age and sex   | Life expectancy and healthy life expectancy at birth (years)                                                                                                   |
|                            | Adult mortality rate between 15 and 60 years of age (Adult mortality rate (probability of dying between 15 and 60 years per 1000 population))                  |
|                            | Under-five mortality rate (per 1000 live births)                                                                                                               |
|                            | Infant mortality rate (per 1000 live births)                                                                                                                   |
|                            | Neonatal mortality rate (per 1000 live births)                                                                                                                 |
| Mortality by cause         | Maternal mortality ratio (Maternal mortality ratio (per 100 000 live births))                                                                                  |
|                            | TB mortality rate (per 100 000 population)                                                                                                                     |
|                            | AIDS-related mortality rate                                                                                                                                    |
|                            | Mortality from unsafe water, unsafe sanitation and lack of hygiene                                                                                             |
| Morbidity                  | HIV prevalence rate (per 1000 population)                                                                                                                      |
|                            | HIV incidence rate (per 1000 population)                                                                                                                       |
|                            | TB incidence rate (per 100 000 population)                                                                                                                     |
| Nutrition                  | Exclusive breastfeeding rate 0–5 months of age (%)                                                                                                             |
|                            | Early initiation of breastfeeding (%)                                                                                                                          |
| Environmental risk factors | Population using safely managed drinking-water services (%)                                                                                                    |
|                            | Population using safely managed sanitation services (Also: population with handwashing facility with soap and water) (%)                                       |
|                            | Air pollution level in cities (ug/m3)                                                                                                                          |
| Non-communicable diseases  | Tobacco use among persons aged 15+ years [SDG 3.a.1] (Also: adolescents) (%)                                                                                   |
|                            | Raised blood pressure among adults (18+ %)                                                                                                                     |
|                            | Overweight and obesity in adults (Also: school-age children and adolescents) (%)                                                                               |
|                            | Raised blood glucose/diabetes among adults (%)                                                                                                                 |
|                            | Insufficient physical activity in adults (Also: adolescents) (%)                                                                                               |
| Immunization               | Immunization coverage rate by vaccine for each vaccine in the national schedule (%)                                                                            |
| Essential health services  | Coverage of essential health services (%)                                                                                                                      |
| Utilization and access     | Health facility density and distribution (Also: access to emergency surgery) (per 10 000 population)                                                           |
|                            | Hospital bed density (per 10 000 population)                                                                                                                   |
|                            | Access to a core set of relevant essential medicines (%)                                                                                                       |
| Health workforce           | Health worker density and distribution (per 10 000 population)                                                                                                 |
| Health information*        | Completeness of reporting by facilities (Also: completeness and timeliness for notifiable diseases)                                                            |
| Health financing           | Total current expenditure on health as % of gross domestic product (Also: total capital expenditure on health as % of current + capital expenditure on health) |
|                            | Public domestic sources of current spending on health as % of current health expenditure                                                                       |
|                            | External source of current spending on health (% of current expenditure on health)                                                                             |

\*Data not available

**Table 2: Descriptive summary of key health system indicators for African countries**

| <u>Variables</u>                                                               | <u>Number of countries</u> | <u>Median (IQR)</u>  | <u>Minimum-Maximum</u> |
|--------------------------------------------------------------------------------|----------------------------|----------------------|------------------------|
| Cummulative COVID-19 deaths                                                    | 53                         | 12.0 (3.0-49.0)      | 0.0- 1088.0            |
| Cummulative COVID-19 deaths per million                                        | 53                         | 2.0 (0.2-6.0)        | 0.0-55.0               |
| Cummulative COVID-19 cases                                                     | 53                         | 820.0 (295.0-2216.0) | 0.0- 37525.0           |
| Cummulative COVID-19 cases per million                                         | 53                         | 63.0 (17.0-243.0)    | 0.0-3987.0             |
| Current health expenditure (CHE) as percentage of gross domestic product (GDP) | 52                         | 5.3 (3.9-6.9)        | 2.8-13.4               |
| BCG immunization coverage among 1-year-olds (%)                                | 52                         | 91.5 (84.0-96.5)     | 52.0-99.0              |
| Early initiation of breastfeeding (%)                                          | 46                         | 51.4 (35.7-65.3)     | 23.0-93.1              |
| Life expectancy at birth (years)                                               | 52                         | 63.2 (59.8-66.1)     | 52.9-76.4              |
| Healthy life expectancy (HALE) at birth (years)                                | 52                         | 55.7 (52.3-57.9)     | 44.9-66.3              |
| Medical doctors (per 10 000 population)                                        | 51                         | 1.6 (0.8-4.0)        | 0.1-25.3               |
| Nursing and midwifery personnel (per 10 000 population)                        | 51                         | 8.8 (4.4-15.5)       | 0.1-80.8               |
| Hospital beds (per 10 000 population)                                          | 51                         | 10.0 (5.0-18.0)      | 1.0-36.0               |
| UHC index of service coverage (SCI)                                            | 52                         | 0.5 (0.4-0.5)        | 0.3-0.8                |
| Prevalence of insufficient physical activity among adults aged 18+ years       | 45                         | 22.1 (15.4-28.0)     | 5.5-41.3               |
| Prevalence of overweight among adults                                          | 51                         | 28.9 (26.2-36.8)     | 20.9-63.5              |
| Incidence of tuberculosis (per 100 000 population per year)                    | 52                         | 175.0 (79.0-303.0)   | 12.0-611.0             |
| Prevalence of HIV among adults aged 15 to 49 (%)                               | 50                         | 1.6 (0.7-4.6)        | 0.1-27.3               |

**Table 3: Risk factors for COVID-19 deaths and cases per million in Africa**

| <u>Variables</u>                                                               | <u>Univariate</u>        |                | <u>Multivariate</u>      |                  |
|--------------------------------------------------------------------------------|--------------------------|----------------|--------------------------|------------------|
|                                                                                | <u>Beta (Std. Error)</u> | <u>p-value</u> | <u>Beta (Std. Error)</u> | <u>p-value</u>   |
| <b>a) <u>Sub-Saharan Africa</u></b>                                            |                          |                |                          |                  |
| <b>Risk factors for deaths</b>                                                 |                          |                |                          |                  |
| BCG immunization coverage among 1-year-olds (%)                                | -0.0302 (0.0189)         | 0.1106         | -0.0293 (0.0191)         | 0.1242           |
| Nursing and midwifery personnel (per 10 000 population)                        | -0.0324 (0.0343)         | 0.3467         | -0.0426 (0.0178)         | <b>0.0171</b>    |
| UHC index of service coverage (SCI)                                            | 4.8486 (1.7709)          | 0.0062         | 4.7049 (2.3268)          | <b>0.0432</b>    |
| Prevalence of insufficient physical activity among adults aged 18+ years       | 0.1201 (0.0243)          | <.0001         | 0.0830 (0.0333)          | <b>0.0127</b>    |
| <b>Risk factors for cases per million</b>                                      |                          |                |                          |                  |
| Early initiation of breastfeeding (%)                                          | -0.0534 (0.0143)         | 0.0002         | -0.0563 (0.0136)         | <b>&lt;.0001</b> |
| Healthy life expectancy (HALE) at birth (years)                                | 0.0917 (0.0410)          | 0.0251         | 0.0870 (0.0415)          | <b>0.0373</b>    |
| Prevalence of overweight among adults                                          | 0.0958 (0.0390)          | 0.0140         | 0.0417 (0.0340)          | 0.2214           |
| <b>b) <u>All the African countries</u></b>                                     |                          |                |                          |                  |
| <b>Risk factors for deaths (all countries)</b>                                 |                          |                |                          |                  |
| Early initiation of breastfeeding (%)                                          | -0.0437 (0.0183)         | 0.0205         | -0.0514 (0.0171)         | <b>0.0027</b>    |
| Healthy life expectancy (HALE) at birth (years)                                | 0.0865 (0.0465)          | 0.0626         | 0.1059 (0.0483)          | <b>0.0285</b>    |
| <b>Risk factors for cases per million (all countries)</b>                      |                          |                |                          |                  |
| Current health expenditure (CHE) as percentage of gross domestic product (GDP) | -0.1913 (0.0896)         | 0.0328         | -0.1739 (0.0845)         | <b>0.0397</b>    |
| Early initiation of breastfeeding (%)                                          | -0.0476 (0.0169)         | 0.0049         | -0.0460 (0.0167)         | <b>0.0061</b>    |

STROBE Statement—Checklist of items that should be included in reports of *cross-sectional studies*

|                           | Item No | Recommendation                                                                                                                                                                       | Submitted Manuscript                                                                                                                        |
|---------------------------|---------|--------------------------------------------------------------------------------------------------------------------------------------------------------------------------------------|---------------------------------------------------------------------------------------------------------------------------------------------|
| <b>Title and abstract</b> | 1       | (a) Indicate the study's design with a commonly used term in the title or the abstract                                                                                               | The title of the manuscript includes the study design and other commonly used terms.                                                        |
|                           |         | (b) Provide in the abstract an informative and balanced summary of what was done and what was found                                                                                  | The abstract is structured and provides a comprehensive and balanced summary of the manuscript and the key findings.                        |
| <b>Introduction</b>       |         |                                                                                                                                                                                      |                                                                                                                                             |
| Background/rationale      | 2       | Explain the scientific background and rationale for the investigation being reported                                                                                                 | Paragraph 1 and 2 of the introduction                                                                                                       |
| Objectives                | 3       | State specific objectives, including any prespecified hypotheses                                                                                                                     | Paragraph 3 of the introduction                                                                                                             |
| <b>Methods</b>            |         |                                                                                                                                                                                      |                                                                                                                                             |
| Study design              | 4       | Present key elements of study design early in the paper                                                                                                                              | Paragraph 1 of Methodology                                                                                                                  |
| Setting                   | 5       | Describe the setting, locations, and relevant dates, including periods of recruitment, exposure, follow-up, and data collection                                                      | Paragraph 1 of Methodology on setting being Africa and the period being year 2020. Other setting parameters listed here are not applicable. |
| Participants              | 6       | (a) Give the eligibility criteria, and the sources and methods of selection of participants                                                                                          | Paragraph 1 methods clarifies that only one eligibility was used i.e being a country in Africa.                                             |
| Variables                 | 7       | Clearly define all outcomes, exposures, predictors, potential confounders, and effect modifiers. Give diagnostic criteria, if applicable                                             | All the variables used in the study are clearly defined. See Table 1 and definition of variables under the Methodology section.             |
| Data sources/measurement  | 8*      | For each variable of interest, give sources of data and details of methods of assessment (measurement). Describe comparability of assessment methods if there is more than one group | Paragraph 1 of statistical methods.                                                                                                         |
| Bias                      | 9       | Describe any efforts to address potential sources of bias                                                                                                                            | Statistical methodology paragraph 4. Multiple imputation was used to minimise potential bias due to missing data.                           |
| Study size                | 10      | Explain how the study size was arrived at                                                                                                                                            | N/A                                                                                                                                         |
| Quantitative variables    | 11      | Explain how quantitative variables were handled in the analyses. If applicable, describe which groupings were chosen and why                                                         | This is done in the statistical methodology section.                                                                                        |
| Statistical methods       | 12      | (a) Describe all statistical methods, including those used to control for confounding                                                                                                | Yes all statistical methods used are described in the statistical methodology section                                                       |
|                           |         | (b) Describe any methods used to examine                                                                                                                                             | N/A                                                                                                                                         |

|                   |     |                                                                                                                                                                                                              |                                                                                                                                |
|-------------------|-----|--------------------------------------------------------------------------------------------------------------------------------------------------------------------------------------------------------------|--------------------------------------------------------------------------------------------------------------------------------|
|                   |     | subgroups and interactions                                                                                                                                                                                   |                                                                                                                                |
|                   |     | (c) Explain how missing data were addressed                                                                                                                                                                  | Statistical methods paragraph 5.                                                                                               |
|                   |     | (d) If applicable, describe analytical methods taking account of sampling strategy                                                                                                                           | NA                                                                                                                             |
|                   |     | (e) Describe any sensitivity analyses                                                                                                                                                                        | Sensitivity analyses looking at sub-Saharan Africa and the whole of Africa is presented in Statistical Methodology Paragraph 6 |
| <b>Results</b>    |     |                                                                                                                                                                                                              |                                                                                                                                |
| Participants      | 13* | (a) Report numbers of individuals at each stage of study—eg numbers potentially eligible, examined for eligibility, confirmed eligible, included in the study, completing follow-up, and analysed            | NA                                                                                                                             |
|                   |     | (b) Give reasons for non-participation at each stage                                                                                                                                                         | NA                                                                                                                             |
|                   |     | (c) Consider use of a flow diagram                                                                                                                                                                           | NA                                                                                                                             |
| Descriptive data  | 14* | (a) Give characteristics of study participants (eg demographic, clinical, social) and information on exposures and potential confounders                                                                     | (a) is not applicable. Descriptive characteristics of countries is presented in Table 2.                                       |
|                   |     | (b) Indicate number of participants with missing data for each variable of interest                                                                                                                          | NA                                                                                                                             |
| Outcome data      | 15* | Report numbers of outcome events or summary measures                                                                                                                                                         | These are presented in Table 2                                                                                                 |
| Main results      | 16  | (a) Give unadjusted estimates and, if applicable, confounder-adjusted estimates and their precision (eg, 95% confidence interval). Make clear which confounders were adjusted for and why they were included | Yes this are done for univariate (unadjusted) and multivariate (adjusted) regressions (See Table 3)                            |
|                   |     | (b) Report category boundaries when continuous variables were categorized                                                                                                                                    | NA                                                                                                                             |
|                   |     | (c) If relevant, consider translating estimates of relative risk into absolute risk for a meaningful time period                                                                                             | NA                                                                                                                             |
| Other analyses    | 17  | Report other analyses done—eg analyses of subgroups and interactions, and sensitivity analyses                                                                                                               | Yes this is done. A separate analysis for sub Saharan Africa was done and findings presented.                                  |
| <b>Discussion</b> |     |                                                                                                                                                                                                              |                                                                                                                                |
| Key results       | 18  | Summarise key results with reference to study objectives                                                                                                                                                     | Discussion section paragraph 1 presents a summary of key results.                                                              |
| Limitations       | 19  | Discuss limitations of the study, taking into account sources of potential bias or imprecision. Discuss both direction and                                                                                   | The limitations are presented in the second last paragraph of the discussion section.                                          |



|                          |    |                                                                                                                                                                            |                                                                    |
|--------------------------|----|----------------------------------------------------------------------------------------------------------------------------------------------------------------------------|--------------------------------------------------------------------|
|                          |    | magnitude of any potential bias                                                                                                                                            |                                                                    |
| Interpretation           | 20 | Give a cautious overall interpretation of results considering objectives, limitations, multiplicity of analyses, results from similar studies, and other relevant evidence | This is presented in the last paragraph of the discussion section. |
| Generalisability         | 21 | Discuss the generalisability (external validity) of the study results                                                                                                      | Yes                                                                |
| <b>Other information</b> |    |                                                                                                                                                                            |                                                                    |
| Funding                  | 22 | Give the source of funding and the role of the funders for the present study and, if applicable, for the original study on which the present article is based              | A statement is provided on source of funding                       |

\*Give information separately for exposed and unexposed groups.

**Note:** An Explanation and Elaboration article discusses each checklist item and gives methodological background and published examples of transparent reporting. The STROBE checklist is best used in conjunction with this article (freely available on the Web sites of PLoS Medicine at <http://www.plosmedicine.org/>, Annals of Internal Medicine at <http://www.annals.org/>, and Epidemiology at <http://www.epidem.com/>). Information on the STROBE Initiative is available at [www.strobe-statement.org](http://www.strobe-statement.org).



# BMJ Open

## Factors associated with COVID-19 infections and mortality in Africa: A cross-sectional study using publicly available data

|                                 |                                                                                                                                                                                                                                                                                                                                             |
|---------------------------------|---------------------------------------------------------------------------------------------------------------------------------------------------------------------------------------------------------------------------------------------------------------------------------------------------------------------------------------------|
| Journal:                        | <i>BMJ Open</i>                                                                                                                                                                                                                                                                                                                             |
| Manuscript ID                   | bmjopen-2020-042750.R2                                                                                                                                                                                                                                                                                                                      |
| Article Type:                   | Original research                                                                                                                                                                                                                                                                                                                           |
| Date Submitted by the Author:   | 07-Oct-2020                                                                                                                                                                                                                                                                                                                                 |
| Complete List of Authors:       | Okeahalam, Charles; University of the Witwatersrand, School of Economics and Finance, Faculty of Commerce<br>Williams, Victor; University of the Witwatersrand, School of Public Health, Faculty of Health Sciences<br>Otwombe, Kennedy; University of the Witwatersrand Perinatal HIV Research Unit, Statistics and Data Management Centre |
| <b>Primary Subject Heading</b>: | Epidemiology                                                                                                                                                                                                                                                                                                                                |
| Secondary Subject Heading:      | Epidemiology, Global health, Infectious diseases, Public health                                                                                                                                                                                                                                                                             |
| Keywords:                       | COVID-19, EPIDEMIOLOGY, PUBLIC HEALTH, STATISTICS & RESEARCH METHODS                                                                                                                                                                                                                                                                        |
|                                 |                                                                                                                                                                                                                                                                                                                                             |

SCHOLARONE™  
Manuscripts



I, the Submitting Author has the right to grant and does grant on behalf of all authors of the Work (as defined in the below author licence), an exclusive licence and/or a non-exclusive licence for contributions from authors who are: i) UK Crown employees; ii) where BMJ has agreed a CC-BY licence shall apply, and/or iii) in accordance with the terms applicable for US Federal Government officers or employees acting as part of their official duties; on a worldwide, perpetual, irrevocable, royalty-free basis to BMJ Publishing Group Ltd ("BMJ") its licensees and where the relevant Journal is co-owned by BMJ to the co-owners of the Journal, to publish the Work in this journal and any other BMJ products and to exploit all rights, as set out in our [licence](#).

The Submitting Author accepts and understands that any supply made under these terms is made by BMJ to the Submitting Author unless you are acting as an employee on behalf of your employer or a postgraduate student of an affiliated institution which is paying any applicable article publishing charge ("APC") for Open Access articles. Where the Submitting Author wishes to make the Work available on an Open Access basis (and intends to pay the relevant APC), the terms of reuse of such Open Access shall be governed by a Creative Commons licence – details of these licences and which [Creative Commons](#) licence will apply to this Work are set out in our licence referred to above.

Other than as permitted in any relevant BMJ Author's Self Archiving Policies, I confirm this Work has not been accepted for publication elsewhere, is not being considered for publication elsewhere and does not duplicate material already published. I confirm all authors consent to publication of this Work and authorise the granting of this licence.

1  
2  
3  
4 **Title: Factors associated with COVID-19 infections and mortality in Africa: A**  
5 **cross-sectional study using publicly available data**

6  
7 **Charles Okeahalam<sup>1</sup>, Victor Williams<sup>2</sup>, Kennedy Otwombe<sup>2,3</sup>**

8  
9 <sup>1</sup>School of Economics and Finance, Faculty of Commerce, University of the Witwatersrand

10 <sup>2</sup>School of Public Health, Faculty of Health Sciences, University of the Witwatersrand

11 <sup>3</sup>Perinatal HIV Research Unit, Faculty of Health Sciences, University of the Witwatersrand

12 Corresponding author: [otwombek@phru.co.za](mailto:otwombek@phru.co.za)

13  
14  
15 **Abstract**

16 **Introduction**

17 The current COVID-19 pandemic is a global threat. This elicits questions on the level of  
18 preparedness and capacity of health systems to respond to emergencies relative to  
19 other parts of the world.

20 **Methods**

21 This cross-sectional study uses publicly available core health data for 53 African  
22 countries, to determine risk factors for cumulative COVID-19 deaths and cases per  
23 million in all countries in the continent. Descriptive statistics were determined for the  
24 indicators and a negative binomial regression was used for modelling the risk factors.

25 **Results**

26 In Sub-Saharan Africa, an increase in the number of nursing and midwifery personnel  
27 decreased the risk of COVID-19 deaths ( $p=0.0178$ ) while a unit increase in universal  
28 health care (UHC) index of service coverage and prevalence of insufficient physical  
29 activity among adults increased the risk of COVID-19 deaths ( $p=0.0432$  and  $p=0.0127$ ).  
30 An increase in the proportion of infants initiating breastfeeding reduced the number of  
31 cases per million ( $p<0.0001$ ) while an increase in higher healthy life expectancy at birth  
32 increased the number of cases per million ( $p=0.0340$ ).

33 **Conclusion**

34 Despite its limited resources, Africa's preparedness and response to the COVID-19  
35 pandemic can be improved by identifying and addressing *specific* gaps in the funding of  
36 health services delivery. These gaps impact negatively on service delivery in Africa  
37 which requires more nursing personnel and increased UHC coverage to mitigate the  
38 effects of COVID-19.  
39  
40  
41  
42  
43  
44  
45  
46  
47  
48  
49  
50  
51  
52  
53  
54  
55  
56  
57  
58  
59  
60

## **Article Summary**

### a. Strengths of the study:

- i. Innovative use of credible publicly available data which can easily be accessed and verified
- ii. Use of multiple imputation technique to address missing observations in the different variables.
- iii. Use of robust negative binomial regression analysis method which allows for modeling of over-dispersion in the data.

### b. Limitations of the study:

- i. Extracted data had missing observations which necessitated excluding some variables.
- ii. The methods used to impute for missing data may have overestimated the variance

## Introduction

In January 2020, the severe acute respiratory syndrome coronavirus 2 (SARS-CoV-2) popularly referred to as COVID-19 was identified as the cause of unknown pneumonia in Wuhan, China. Two months later, the World Health Organisation (WHO) classified COVID-19 as a pandemic. COVID-19 is a global health threat. Since March 2020, there has been a rapid increase in the number of cases globally. Globally, as of 30<sup>th</sup> August 2020, there have been 24,822,800 confirmed cases of COVID-19, including 838,360 deaths, reported to WHO.<sup>1 2</sup> In a bid to stop the virus from spreading, there has been a global restriction on several activities including travelling.<sup>3 4</sup> The economic impact of a global shutdown and pressure on frail health systems of many countries across the world presents great uncertainty for the remaining half of the year and the immediate future.

The United States of America, Brazil, the United Kingdom and countries in Western Europe notably Italy, Spain and France account for the highest number of COVID-19 cases and mortality.<sup>2</sup> With the possible exception of Brazil, these countries have advanced health systems, reliable epidemic surveillance and response systems and have been able to mobilize resources with which to respond. However, due to the sudden increase in demand for health personnel, test kits, emergency care equipment and personal protective equipment, the health systems of all affected countries have been put under significant strain. With varying efficacy, the affected countries have increased hospital facilities for critical cases, increased the daily number of tests to identify positive cases and increased provision of personal protective equipment (PPE) for health personnel.<sup>4 5</sup>

At present, in comparison to the United States of America (USA), and Europe, Africa has a lower number of cases and lower daily increase in infection. While this may seem an advantage, the WHO continues to express concern about the impact COVID-19 may have on Africa. This is because, from the perspective of capacity, African countries are in a parlous situation relative to Europe, North America and some parts of Asia. The health systems of many African countries have limited ability to roll out widespread community screening and testing, few health personnel, and limited emergency facilities to manage critically ill COVID-19 patients.<sup>6</sup> The easing of restrictions on social and economic activities is likely to lead to a second wave of cases of COVID-19 in African countries. So with the best will and effort, African countries cannot use the same methodology to respond and contain the pandemic to the level of the developed countries that have performed badly, let alone to that of those that have performed well. If they are to use their limited capacity efficiently, it is imperative African countries clearly identify factors that will support that objective and institute effective evidence-based approaches to managing COVID-19. Accordingly, in a bid to support focus on efficient capacity development, this study analyzes the relationship between health indicators and COVID-19 deaths and cases in African countries. While the indicators were drawn from different thematic areas, our analysis was largely data driven. We conducted analysis for sub-Saharan African (SSA) countries - the standard multilateral institutions data classification of Africa and also for all the countries on the

continent including those north of the Sahara, usually classified with the Middle East region. We present our analysis by SSA countries due to their higher burden of disease and all of Africa.

## Methodology

This is a cross-sectional study of the most recent 2020 data for African countries extracted from the World Health Organisation Global Health Observatory Repository.<sup>7</sup> Before extraction, the research team reviewed available indicators in the 2018 Global Reference List of 100 Core Health Indicators (plus health-related SDGs)<sup>8</sup> and listed different indicators by thematic areas. These indicators directly or indirectly describe the potential ability of a country's health system to respond to the health needs of the population and may further determine the extent available services can be expanded to accommodate emergencies. Data on confirmed cases of coronavirus and deaths were obtained from the Worldometer Coronavirus Live Update.<sup>9</sup>

### Definition of variables

*BCG immunization coverage among 1-year olds (%)*: BCG immunization coverage among 1-year olds (%).<sup>10</sup>

*Nursing and midwifery personnel (per 10 000 population)*: It is the density of nurses and midwifery personnel per 10 000 people.<sup>10</sup>

*UHC index of service coverage*: Coverage of essential health services such as reproductive, maternal, newborn and child health amongst others.<sup>10</sup>

*Prevalence of insufficient physical activity among adults aged 18+ years*: Insufficient physical activity was defined as adults not meeting the WHO recommendations on physical activity for health i.e, at least 150 min of moderate-intensity, or 75 min of vigorous-intensity physical activity per week, or any equivalent combination of the two.<sup>11</sup>

*Early initiation of breastfeeding (%)*: Initiation of breastfeeding within the first hour of birth and exclusively breastfed for the first six months of life.<sup>12</sup>

*Healthy life expectancy at birth (years)*: This is a life expectancy estimate that applies disability weights to health states to compute the equivalent number of years of good health that a new born can expect.<sup>13</sup>

*Life expectancy at birth*: This reflects the overall mortality level of a population. It summarizes the mortality pattern that prevails across all age groups - children and adolescents, adults and the elderly.<sup>14</sup>

*Prevalence of overweight among adults*: Adults with a body mass index  $\geq 30$ .

*Current health expenditure (CHE) as a percentage of gross domestic product (GDP)*: This indicates the level of resources channelled to health relative to other uses.<sup>10</sup>

## Statistical methodology

Data for 32 indicators (or variables) from 12 thematic areas were extracted from the 2018 Global Reference List of 100 Core Health Indicators (Table 1). The 12 thematic areas are Mortality by Age and Sex, Mortality by Cause, Morbidity, Nutrition, Environmental Risk Factors, Non-Communicable Diseases, Immunization, Essential

1  
2  
3  
4 health services, Utilization and access, Health workforce, Health Information and Health  
5 financing.  
6

7  
8 Data were extracted in .xls format for each variable and imported into STATA 15.0  
9 software (StataCorp LLC College Station, TX). For each variable, the most recent data  
10 for all countries included in the study were retained with the corresponding year and  
11 country name in .dta format. The different variables were merged using the country  
12 name as the unique identifier to obtain the final data set used for the analysis. The  
13 countries were further categorized into their assigned WHO region and World Bank  
14 income group except Somalia that had missing data.  
15

16  
17 All data on health indicators were continuous and were analysed descriptively using  
18 median, interquartile range (IQR) and minimum and maximum values.  
19

20  
21 Of the 53 countries included in the analyses, there were varying proportions of < 10%  
22 missing data. To address this, we assumed a missing at random mechanism and  
23 applied a multiple imputation technique with ten imputations and summarised the results  
24 across all the datasets.<sup>15</sup> The fit of the multiple imputation was evaluated using variance  
25 information measures including relative efficiency.  
26

27  
28 The process of selection of variables for analysis was as follows. Firstly, the team  
29 reviewed all the core publicly available health indicators. Then the plausibility of the  
30 explanatory power of these variables in the context of this study was subjected to  
31 various statistical approaches. These include the use of univariate and multivariate  
32 regression selection procedures. This approach enabled the identification of the final  
33 variables.  
34

35  
36 Due to its flexibility in allowing for overdispersion, risk factors for cumulative COVID-19  
37 deaths and cases per million were fitted using the negative binomial regression. Both  
38 univariate and multivariate regression models were fitted. In the multivariate model, a  
39 full model including all the variables was fitted and the final model determined using the  
40 backward selection procedure. Regression models were fitted for sub-Saharan Africa  
41 followed by a sensitivity analyses including all the countries in the continent. Model fit  
42 was assessed using the ratio of the deviance, scaled deviance, Pearson Chi-square  
43 and scaled Pearson Chi-square divided by the degrees of freedom. Additionally, we  
44 also assessed model fit using the cumulative sum of residual plots with 10 000  
45 replications. Deaths and cases per million were those reported in the Worldometer as of  
46 29<sup>th</sup> May 2020.  
47  
48

49  
50 All statistical analyses were conducted using SAS Enterprise Guide 7.15 (SAS Institute  
51 Inc., NC, USA).  
52

## 53 **Results**

### 54 Characteristics

55 A total of 53 countries from Africa were included in this analysis (Table 2). The  
56 median number of cumulative COVID-19 deaths across the African continent was 12  
57  
58  
59  
60



(IQR: 3-49), cumulative deaths per million (2, IQR:0.2-6.0), cumulative COVID-19 cases [820, IQR: 295-2216], cumulative cases per million (63, IQR: 17.0-243.0), current health expenditure was 5.3 (IQR: 3.9-6.9) and BCG immunisation coverage in 1-year olds was 91.5% (IQR: 84.0-96.5). The median life expectancy was 63.2 years (IQR: 59.8-66.1), healthy life expectancy 55.7 years (IQR: 52.3-57.9), medical doctors per 10 000 population was 1.6 (IQR: 0.8-4.0), nursing and midwifery personnel per 10 000 was 8.8 (IQR: 4.4-15.5) and universal health care (UHC) index of service coverage 0.5 (IQR: 0.4-0.5).

### Risk factors for sub-Saharan Africa

#### *Cumulative COVID-19 deaths*

In the multivariate regression, modelling risk factors for COVID-19 deaths in sub-Saharan Africa and controlling for BCG immunization coverage, a unit increase in the number of nursing and midwifery personnel decreased the risk of death by 0.0426 ( $p=0.0178$ ) whereas a unit increase in the UHC index of service coverage and prevalence of insufficient physical activity among adults aged 18+ years increased the risk of COVID-19 deaths by 4.7049 ( $p=0.0432$ ) and 0.0830 ( $p=0.0127$ ) respectively (Table 3).

#### *Cumulative Cases per Million*

A unit increase in the proportion of infants initiating breastfeeding reduces the number of cases per million by 0.0563 ( $p<0.0001$ ) whereas an increase in higher healthy life expectancy at birth increases the number of COVID-19 cases per million by 0.0417 ( $p=0.0340$ ).

### Risk factors for all the African countries

#### *Cumulative COVID-19 deaths*

Early initiation of breastfeeding (Beta= -0.0514,  $p$ -value=0.0027) was associated with a lower risk of death whereas increasing healthy life expectancy at birth was associated with a higher risk of death (Beta=0.1059,  $p$ -value=0.0285).

#### *Cumulative cases per million*

An increase in the current health expenditure as a percentage of GDP (Beta=-0.1739,  $p$ -value=0.0397) and the percentage initiated early on breastfeeding (Beta=-0.0460,  $p$ -value=0.0061) was associated with a decrease in cases of COVID-19 per million (Table 3).

In the multiple imputation estimations, the relative efficiency of variables where imputation was conducted ranged from 95% to 99% whereas the scaled deviance values for the regression models were within the acceptable range.

## **Discussion**

This study considers the factors associated with COVID-19 deaths and infection cases per million from 53 of 54 African countries. In summary, building health capacity by

1  
2  
3  
4 increasing the number of nursing and midwifery personnel will reduce COVID-19 deaths  
5 in sub-Saharan Africa. However, we also found that higher UHC index of service  
6 coverage and prevalence of insufficient physical activity in adults  $\geq 18$  years increases  
7 fatalities. Additionally, having a population with a high proportion of people where  
8 breastfeeding had been initiated early, provided protection. A higher healthy life  
9 expectancy increased the risk of cases. When evaluating all the African countries, the  
10 initiation of early breastfeeding was protective against death whereas higher healthy life  
11 expectancy increased the risk of death. We also find that an increase in current health  
12 expenditure levels provide additional protection against COVID-19 infections.  
13  
14

15  
16 Delving deeper into our results, the finding that an increase in the number of nursing  
17 and midwifery personnel reduced the risk of COVID-19 related mortality in sub-Saharan  
18 Africa echo findings from other parts of the world where the benefits of preparedness  
19 and available capacity has been shown to confer benefits in the management and care  
20 of patients.<sup>16 17</sup> Where capacity shortages exist in the health sector, there is potential for  
21 poor outcomes in the management and care of COVID-19 patients. Major gaps still exist  
22 in the implementation of the WHO International Health Regulations, notably increasing  
23 capacity of hospitals and appropriate injection of financial resources.<sup>17</sup> The results  
24 confirm the point made earlier that unlike the other COVID-19 affected parts of the  
25 world, Africa has less capacity to handle a major outbreak of COVID-19. Therefore,  
26 African governments need to strengthen the overall health care systems and in doing  
27 so, specific focus needs to be placed on enhancing human resource capacity such as  
28 nurses, medical doctors and laboratory personnel.  
29  
30

31  
32 Our findings also illustrate that a higher UHC index of service coverage increases the  
33 risk of fatalities. While counter-intuitive, this may be driven by the countries in  
34 sub-Saharan Africa with the largest economies that have also had the largest number of  
35 cases and mortality: South Africa and Nigeria. A large number of people from these two  
36 countries travel internationally, in particular to Europe and it is likely that they have  
37 contracted the disease there and have imported it back into their countries.<sup>18</sup> To assess  
38 the robustness of this finding, we conducted a sensitivity analysis by removing the data  
39 on South Africa and Nigeria and re-estimated the model. No major differences relative  
40 to the first regression were observed suggesting that importation of infections similarly  
41 occurred in other sub-Saharan African countries.  
42  
43

44  
45 Additionally, that cohort of the population that travels internationally is generally able to  
46 afford COVID-19 test kits and conduct more tests. Testing is a critical requirement for  
47 effective management of COVID-19. From a statistical perspective, testing identifies  
48 cases which may be managed before getting severe resulting in deaths. This increases  
49 the number of observations on deaths. This view is similar to that reported in a previous  
50 paper on the vulnerability of African countries to COVID-19 and their preparedness to  
51 mitigate.<sup>18</sup>  
52

53  
54 More intuitively, we find that insufficient physical activity among adults aged 18+ years  
55 increased the risk of COVID-19 mortality. It is well documented in the literature that the  
56 lack of physical activity increases the risk of obesity.<sup>19</sup> Recent publications on  
57  
58  
59

1  
2  
3  
4 COVID-19 related mortality, have shown that obesity elevates the risk of mortality.<sup>20 21</sup>  
5 Physical inactivity has long been recognized as a risk factor for non-communicable  
6 diseases which is a known cause of mortality globally.<sup>22 23</sup> Early studies since the onset  
7 of the COVID-19 outbreak in China indicated elderly patients and those with  
8 co-morbidities particularly diabetes, hypertension and chronic respiratory diseases were  
9 at increased risk of mortality from COVID-19.<sup>24 25</sup> Therefore, the finding of insufficient  
10 physical activity as a risk factor for death from our study is consistent with earlier studies  
11 (1).<sup>23</sup> Similarly, immunization has proved effective in prevention of different types of  
12 infectious diseases globally while breastfeeding provides babies with essential nutrients  
13 and antibodies to help prevent infections early in life. Hence, establishment of expanded  
14 program on immunization (EPI) and programs to encourage breastfeeding globally.  
15 Thus we postulate that the population of Africans aged 18+ years who do not undertake  
16 sufficient physical activity may be similarly at high risk of mortality.  
17  
18  
19

20 We also found that where a large population is exposed to early initiation of  
21 breastfeeding, there was protection against COVID-19 infection. Research on the  
22 long-term benefits of breastfeeding is growing and recent evidence suggests a  
23 protective effect against some chronic diseases in adulthood.<sup>26 27</sup> It may be that this  
24 protective effect extends to non-severe cases of COVID-19.  
25  
26

27 Further, in sub-Saharan Africa and all the African countries combined, higher healthy  
28 life expectancy (life expectancy that accounts for disabilities) in this study was  
29 associated with a higher risk of COVID-19 infection. Our findings are in tandem with  
30 previously published work on risk factors for COVID-19 infection from around the world  
31 that have shown older people are at higher risk for COVID-19 infection. Being older is  
32 associated with lower immunity and inflammatory reactions and a higher risk of  
33 comorbidities such as diabetes and hypertension amongst others. Such factors  
34 predispose older cohorts of the population to COVID-19 infection.  
35  
36

37 This study is not without limitations. The data used was sourced from publicly available  
38 repositories and therefore we had no control in sampling, study design and data  
39 collection processes. The study we conducted is cross-sectional and therefore cannot  
40 deduce causality. Since COVID-19 statistics are updated on a daily basis, the findings  
41 we report may vary with updated data. Despite these challenges, we applied robust  
42 statistical analysis methods to alleviate potential biases.  
43  
44

45 In conclusion, our study findings showed a relationship between COVID-19 cases and  
46 deaths with health capacity, breast feeding, life expectancy (as a proxy for age) and  
47 healthcare funding. Timely identification of the key evidence-based factors that might  
48 mitigate COVID-19 infections and deaths in Africa is pertinent for better management of  
49 the current and future pandemics. This may include investing in healthcare capacity  
50 building, infrastructure, disease surveillance, public health laboratories and all other  
51 aspects that relate to health as elucidated in the WHO International Health  
52 Regulations.<sup>28</sup>  
53  
54  
55  
56  
57  
58  
59

### Patient and public involvement

This study utilised publicly available health indicators and aggregated COVID-19 cases and deaths. No patients were involved.

### Funding

This work was funded by AGH GROUP, South Africa – Quantitative Analysis of the Impact of COVID-19 in Africa – (Grant number: 002/20).

### Contributorship Statement

CO developed the initial research concept, developing the hypothesis and methodology. VW did the data extraction and merging of the different data sets. KO participated in developing the hypothesis and conducted the data analysis. All the authors participated in interpreting the results and writing the manuscript.

### Data sharing statement

Data used for analysis is available in the Dryad data repository reference DOI: 10.5061/dryad.cnp5hqc2r.

### Ethics, Funding and Data Sharing

1. This study did not require ethical clearance as the data used for analysis is publicly available. Precautions were, however, adopted to document steps taken during data extraction, cleaning and analysis.
2. This manuscript did not receive funding from any organization and the authors declare no competing interest.

### Licence Statement

I, the Submitting Author has the right to grant and does grant on behalf of all authors of the Work (as defined in the below author licence), an exclusive licence and/or a non-exclusive licence for contributions from authors who are: i) UK Crown employees; ii) where BMJ has agreed a CC-BY licence shall apply, and/or iii) in accordance with the terms applicable for US Federal Government officers or employees acting as part of their official duties; on a worldwide, perpetual, irrevocable, royalty-free basis to BMJ Publishing Group Ltd (“BMJ”) its licensees and where the relevant Journal is co-owned by BMJ to the co-owners of the Journal, to publish the Work in BMJ Open and any other BMJ products and to exploit all rights, as set out in our licence.

## References

1. Huang R, Xia J, Chen Y, et al. A family cluster of SARS-CoV-2 infection involving 11 patients in Nanjing, China. *The Lancet Infectious Diseases* 2020;20(5):534-35.
2. World Health Organisation. Coronavirus Disease (COVID-19) Dashboard Geneva: WHO; 2020 [cited 2020 15 June]. Available from: <https://covid19.who.int/> accessed 15 June 2020.
3. World Health Organisation. Novel Coronavirus (2019-nCoV) SITUATION REPORT - 1. 21 January 2020 Geneva: WHO; 2020 [cited 2020 14 June]. Available from: [https://www.who.int/docs/default-source/coronaviruse/situation-reports/20200121-sitrep-1-2019-ncov.pdf?sfvrsn=20a99c10\\_4](https://www.who.int/docs/default-source/coronaviruse/situation-reports/20200121-sitrep-1-2019-ncov.pdf?sfvrsn=20a99c10_4) accessed 14 June 2020.
4. World Health O. Critical preparedness, readiness and response actions for COVID-19: interim guidance, 22 March 2020: World Health Organization, 2020.
5. Remuzzi A, Remuzzi G. COVID-19 and Italy: what next? *The Lancet* 2020;395(10231)
6. Velavan TP, Meyer CG. The COVID-19 epidemic. *Tropical medicine & international health* 2020;25(3):278.
7. World Health Organisation. Global Health Observatory Data Repository Geneva: WHO; 2020 [cited 2020 10 May]. Available from: <https://apps.who.int/gho/data/node.home> accessed 10 May 2020.
8. World Health Organisation. 2018 Global Reference List of 100 Core Health Indicators (plus health-related SDGs). Geneva: WHO; 2018 [cited 2020 30 March]. Available from: <https://www.who.int/healthinfo/indicators/2018/en/> accessed 30 Mach 2020.
9. Worldometer. Covid-19 Coronavirus Pandemic: Worldometer; 2020 [cited 2020 10 May]. Available from: <https://www.worldometers.info/coronavirus/> accessed 10 May 2020.
10. WHO. Global reference list of 100 core health indicators. Accessed on 02 July 2018 at <https://www.who.int/healthinfo/indicators/2018/en/>, 2018.
11. WHO. Global recommendations on physical activity for health. Accessed on 17June2020 at [https://apps.who.int/iris/bitstream/handle/10665/44399/9789241599979\\_eng.pdf;jsessionid=8870764033B6B16FCA9C9279A83A2B66?sequence=1](https://apps.who.int/iris/bitstream/handle/10665/44399/9789241599979_eng.pdf;jsessionid=8870764033B6B16FCA9C9279A83A2B66?sequence=1), 2010.
12. UNICEF W. Capture the Moment – Early initiation of breastfeeding: The best start for every newborn. Accessed on 17 June 2020 at [https://www.unicef.org/publications/files/UNICEF\\_WHO\\_Capture\\_the\\_moment\\_EIBF\\_2018.pdf](https://www.unicef.org/publications/files/UNICEF_WHO_Capture_the_moment_EIBF_2018.pdf). 2018
13. WHO. Healthy life expectancy (HALE) at birth. Accessed on 17June2020 at [https://www.who.int/gho/mortality\\_burden\\_disease/life\\_tables/hale\\_text/en/](https://www.who.int/gho/mortality_burden_disease/life_tables/hale_text/en/) 2020 [
14. WHO. Definitions and metadata. Accessed on 27th August 2020 at <https://www.who.int/whosis/whostat2006DefinitionsAndMetadata.pdf> 2006 [
15. Little RJA, Rubin DB. Statistical analysis with missing data. Hoboken, New Jersey: John Wiley & Sons Inc 2002.



16. Nkengasong JN, Mankoula W. Looming threat of COVID-19 infection in Africa: act collectively, and fast. *Lancet (London, England)* 2020;395(10227):841-42. doi: 10.1016/S0140-6736(20)30464-5 [published Online First: 2020/03/03]
17. Paintsill E. COVID-19 threatens health systems in sub-Saharan Africa: the eye of the crocodile. *The Journal of Clinical Investigation* 2020;130(6):2741-44.
18. Gilbert M, Pullano G, Pinotti F, et al. Preparedness and vulnerability of African countries against importations of COVID-19: a modelling study. *Lancet (London, England)* 2020;395(10227):871-77. doi: 10.1016/S0140-6736(20)30411-6 [published Online First: 2020/02/24]
19. Thompson JK, Jarvie GJ, Lahey BB, et al. Exercise and obesity: etiology, physiology, and intervention. *Psychol Bull* 1982;91(1):55-79. [published Online First: 1982/01/01]
20. Dietz W, Santos-Burgoa C. Obesity and its Implications for COVID-19 Mortality. *Obesity (Silver Spring)* 2020;28(6):1005. doi: 10.1002/oby.22818 [published Online First: 2020/04/03]
21. Palaiodimos L, Kokkinidis DG, Li W, et al. Severe obesity, increasing age and male sex are independently associated with worse in-hospital outcomes, and higher in-hospital mortality, in a cohort of patients with COVID-19 in the Bronx, New York. *Metabolism* 2020;108:154262. doi: 10.1016/j.metabol.2020.154262 [published Online First: 2020/05/19]
22. Reiner M, Niermann C, Jekauc D, et al. Long-term health benefits of physical activity--a systematic review of longitudinal studies. *BMC Public Health* 2013;13:813. doi: 10.1186/1471-2458-13-813 [published Online First: 2013/09/10]
23. Rezende LFM, Garcia LMT, Mielke GI, et al. Physical activity and preventable premature deaths from non-communicable diseases in Brazil. *J Public Health (Oxf)* 2019;41(3):e253-e60. doi: 10.1093/pubmed/fdy183 [published Online First: 2018/10/23]
24. Jordan RE, Adab P, Cheng KK. Covid-19: risk factors for severe disease and death. *BMJ* 2020;368:m1198. doi: 10.1136/bmj.m1198 [published Online First: 2020/03/29]
25. Zhou F, Yu T, Du R, et al. Clinical course and risk factors for mortality of adult inpatients with COVID-19 in Wuhan, China: a retrospective cohort study. *Lancet (London, England)* 2020;395(10229):1054-62. doi: 10.1016/S0140-6736(20)30566-3 [published Online First: 2020/03/15]
26. Binns C, Lee M, Low WY. The Long-Term Public Health Benefits of Breastfeeding. *Asia Pac J Public Health* 2016;28(1):7-14. doi: 10.1177/1010539515624964 [published Online First: 2016/01/23]
27. WHO. Long-term effects of breastfeeding. Accessed on 17 June 2020 at [https://apps.who.int/iris/bitstream/handle/10665/79198/9789241505307\\_eng.pdf?sequence=1](https://apps.who.int/iris/bitstream/handle/10665/79198/9789241505307_eng.pdf?sequence=1). 2013
28. WHO. International health regulations. Accessed on 19th June 2020 at [https://apps.who.int/iris/bitstream/handle/10665/43883/9789241580410\\_eng.pdf;jsessionid=712C63BFFB04F0AAAEC15142D7B46A89?sequence=1](https://apps.who.int/iris/bitstream/handle/10665/43883/9789241580410_eng.pdf;jsessionid=712C63BFFB04F0AAAEC15142D7B46A89?sequence=1), 2005.

**Table 1: Summary of thematic areas of health indicators**

| Thematic Area              | Indicators used                                                                                                                                                |
|----------------------------|----------------------------------------------------------------------------------------------------------------------------------------------------------------|
| Mortality by age and sex   | Life expectancy and healthy life expectancy at birth (years)                                                                                                   |
|                            | Adult mortality rate between 15 and 60 years of age (Adult mortality rate (probability of dying between 15 and 60 years per 1000 population))                  |
|                            | Under-five mortality rate (per 1000 live births)                                                                                                               |
|                            | Infant mortality rate (per 1000 live births)                                                                                                                   |
|                            | Neonatal mortality rate (per 1000 live births)                                                                                                                 |
| Mortality by cause         | Maternal mortality ratio (Maternal mortality ratio (per 100 000 live births))                                                                                  |
|                            | TB mortality rate (per 100 000 population)                                                                                                                     |
|                            | AIDS-related mortality rate                                                                                                                                    |
|                            | Mortality from unsafe water, unsafe sanitation and lack of hygiene                                                                                             |
| Morbidity                  | HIV prevalence rate (per 1000 population)                                                                                                                      |
|                            | HIV incidence rate (per 1000 population)                                                                                                                       |
|                            | TB incidence rate (per 100 000 population)                                                                                                                     |
| Nutrition                  | Exclusive breastfeeding rate 0–5 months of age (%)                                                                                                             |
|                            | Early initiation of breastfeeding (%)                                                                                                                          |
| Environmental risk factors | Population using safely managed drinking-water services (%)                                                                                                    |
|                            | Population using safely managed sanitation services (Also: population with handwashing facility with soap and water) (%)                                       |
|                            | Air pollution level in cities (ug/m3)                                                                                                                          |
| Non-communicable diseases  | Tobacco use among persons aged 15+ years [SDG 3.a.1] (Also: adolescents) (%)                                                                                   |
|                            | Raised blood pressure among adults (18+ %)                                                                                                                     |
|                            | Overweight and obesity in adults (Also: school-age children and adolescents) (%)                                                                               |
|                            | Raised blood glucose/diabetes among adults (%)                                                                                                                 |
|                            | Insufficient physical activity in adults (Also: adolescents) (%)                                                                                               |
| Immunization               | Immunization coverage rate by vaccine for each vaccine in the national schedule (%)                                                                            |
| Essential health services  | Coverage of essential health services (%)                                                                                                                      |
| Utilization and access     | Health facility density and distribution (Also: access to emergency surgery) (per 10 000 population)                                                           |
|                            | Hospital bed density (per 10 000 population)                                                                                                                   |
|                            | Access to a core set of relevant essential medicines (%)                                                                                                       |
| Health workforce           | Health worker density and distribution (per 10 000 population)                                                                                                 |
| Health information*        | Completeness of reporting by facilities (Also: completeness and timeliness for notifiable diseases)                                                            |
| Health financing           | Total current expenditure on health as % of gross domestic product (Also: total capital expenditure on health as % of current + capital expenditure on health) |
|                            | Public domestic sources of current spending on health as % of current health expenditure                                                                       |
|                            | External source of current spending on health (% of current expenditure on health)                                                                             |

\*Data not available



**Table 2: Descriptive summary of key health system indicators for African countries**

| <u>Variables</u>                                                               | <u>Number of countries</u> | <u>Median (IQR)</u>  | <u>Minimum-Maximum</u> |
|--------------------------------------------------------------------------------|----------------------------|----------------------|------------------------|
| Cummulative COVID-19 deaths                                                    | 53                         | 12.0 (3.0-49.0)      | 0.0- 1088.0            |
| Cummulative COVID-19 deaths per million                                        | 53                         | 2.0 (0.2-6.0)        | 0.0-55.0               |
| Cummulative COVID-19 cases                                                     | 53                         | 820.0 (295.0-2216.0) | 0.0- 37525.0           |
| Cummulative COVID-19 cases per million                                         | 53                         | 63.0 (17.0-243.0)    | 0.0-3987.0             |
| Current health expenditure (CHE) as percentage of gross domestic product (GDP) | 52                         | 5.3 (3.9-6.9)        | 2.8-13.4               |
| BCG immunization coverage among 1-year-olds (%)                                | 52                         | 91.5 (84.0-96.5)     | 52.0-99.0              |
| Early initiation of breastfeeding (%)                                          | 46                         | 51.4 (35.7-65.3)     | 23.0-93.1              |
| Life expectancy at birth (years)                                               | 52                         | 63.2 (59.8-66.1)     | 52.9-76.4              |
| Healthy life expectancy (HALE) at birth (years)                                | 52                         | 55.7 (52.3-57.9)     | 44.9-66.3              |
| Medical doctors (per 10 000 population)                                        | 51                         | 1.6 (0.8-4.0)        | 0.1-25.3               |
| Nursing and midwifery personnel (per 10 000 population)                        | 51                         | 8.8 (4.4-15.5)       | 0.1-80.8               |
| Hospital beds (per 10 000 population)                                          | 51                         | 10.0 (5.0-18.0)      | 1.0-36.0               |
| UHC index of service coverage (SCI)                                            | 52                         | 0.5 (0.4-0.5)        | 0.3-0.8                |
| Prevalence of insufficient physical activity among adults aged 18+ years       | 45                         | 22.1 (15.4-28.0)     | 5.5-41.3               |
| Prevalence of overweight among adults                                          | 51                         | 28.9 (26.2-36.8)     | 20.9-63.5              |
| Incidence of tuberculosis (per 100 000 population per year)                    | 52                         | 175.0 (79.0-303.0)   | 12.0-611.0             |
| Prevalence of HIV among adults aged 15 to 49 (%)                               | 50                         | 1.6 (0.7-4.6)        | 0.1-27.3               |

**Table 3: Risk factors for COVID-19 deaths and cases per million in Africa**

| <u>Variables</u>                                                               | <u>Univariate</u>        |                | <u>Multivariate</u>      |                  |
|--------------------------------------------------------------------------------|--------------------------|----------------|--------------------------|------------------|
|                                                                                | <u>Beta (Std. Error)</u> | <u>p-value</u> | <u>Beta (Std. Error)</u> | <u>p-value</u>   |
| <b>a) <u>Sub-Saharan Africa</u></b>                                            |                          |                |                          |                  |
| <b>Risk factors for deaths</b>                                                 |                          |                |                          |                  |
| BCG immunization coverage among 1-year-olds (%)                                | -0.0302 (0.0189)         | 0.1106         | -0.0293 (0.0191)         | 0.1242           |
| Nursing and midwifery personnel (per 10 000 population)                        | -0.0324 (0.0343)         | 0.3467         | -0.0426 (0.0178)         | <b>0.0171</b>    |
| UHC index of service coverage (SCI)                                            | 4.8486 (1.7709)          | 0.0062         | 4.7049 (2.3268)          | <b>0.0432</b>    |
| Prevalence of insufficient physical activity among adults aged 18+ years       | 0.1201 (0.0243)          | <.0001         | 0.0830 (0.0333)          | <b>0.0127</b>    |
| <b>Risk factors for cases per million</b>                                      |                          |                |                          |                  |
| Early initiation of breastfeeding (%)                                          | -0.0534 (0.0143)         | 0.0002         | -0.0563 (0.0136)         | <b>&lt;.0001</b> |
| Healthy life expectancy (HALE) at birth (years)                                | 0.0917 (0.0410)          | 0.0251         | 0.0870 (0.0415)          | <b>0.0373</b>    |
| Prevalence of overweight among adults                                          | 0.0958 (0.0390)          | 0.0140         | 0.0417 (0.0340)          | 0.2214           |
| <b>b) <u>All the African countries</u></b>                                     |                          |                |                          |                  |
| <b>Risk factors for deaths (all countries)</b>                                 |                          |                |                          |                  |
| Early initiation of breastfeeding (%)                                          | -0.0437 (0.0183)         | 0.0205         | -0.0514 (0.0171)         | <b>0.0027</b>    |
| Healthy life expectancy (HALE) at birth (years)                                | 0.0865 (0.0465)          | 0.0626         | 0.1059 (0.0483)          | <b>0.0285</b>    |
| <b>Risk factors for cases per million (all countries)</b>                      |                          |                |                          |                  |
| Current health expenditure (CHE) as percentage of gross domestic product (GDP) | -0.1913 (0.0896)         | 0.0328         | -0.1739 (0.0845)         | <b>0.0397</b>    |
| Early initiation of breastfeeding (%)                                          | -0.0476 (0.0169)         | 0.0049         | -0.0460 (0.0167)         | <b>0.0061</b>    |

STROBE Statement—Checklist of items that should be included in reports of *cross-sectional studies*

|                           | Item No | Recommendation                                                                                                                                                                       | Submitted Manuscript                                                                                                                        |
|---------------------------|---------|--------------------------------------------------------------------------------------------------------------------------------------------------------------------------------------|---------------------------------------------------------------------------------------------------------------------------------------------|
| <b>Title and abstract</b> | 1       | (a) Indicate the study's design with a commonly used term in the title or the abstract                                                                                               | The title of the manuscript includes the study design and other commonly used terms.                                                        |
|                           |         | (b) Provide in the abstract an informative and balanced summary of what was done and what was found                                                                                  | The abstract is structured and provides a comprehensive and balanced summary of the manuscript and the key findings.                        |
| <b>Introduction</b>       |         |                                                                                                                                                                                      |                                                                                                                                             |
| Background/rationale      | 2       | Explain the scientific background and rationale for the investigation being reported                                                                                                 | Paragraph 1 and 2 of the introduction                                                                                                       |
| Objectives                | 3       | State specific objectives, including any prespecified hypotheses                                                                                                                     | Paragraph 3 of the introduction                                                                                                             |
| <b>Methods</b>            |         |                                                                                                                                                                                      |                                                                                                                                             |
| Study design              | 4       | Present key elements of study design early in the paper                                                                                                                              | Paragraph 1 of Methodology                                                                                                                  |
| Setting                   | 5       | Describe the setting, locations, and relevant dates, including periods of recruitment, exposure, follow-up, and data collection                                                      | Paragraph 1 of Methodology on setting being Africa and the period being year 2020. Other setting parameters listed here are not applicable. |
| Participants              | 6       | (a) Give the eligibility criteria, and the sources and methods of selection of participants                                                                                          | Paragraph 1 methods clarifies that only one eligibility was used i.e being a country in Africa.                                             |
| Variables                 | 7       | Clearly define all outcomes, exposures, predictors, potential confounders, and effect modifiers. Give diagnostic criteria, if applicable                                             | All the variables used in the study are clearly defined. See Table 1 and definition of variables under the Methodology section.             |
| Data sources/measurement  | 8*      | For each variable of interest, give sources of data and details of methods of assessment (measurement). Describe comparability of assessment methods if there is more than one group | Paragraph 1 of statistical methods.                                                                                                         |
| Bias                      | 9       | Describe any efforts to address potential sources of bias                                                                                                                            | Statistical methodology paragraph 4. Multiple imputation was used to minimise potential bias due to missing data.                           |
| Study size                | 10      | Explain how the study size was arrived at                                                                                                                                            | N/A                                                                                                                                         |
| Quantitative variables    | 11      | Explain how quantitative variables were handled in the analyses. If applicable, describe which groupings were chosen and why                                                         | This is done in the statistical methodology section.                                                                                        |
| Statistical methods       | 12      | (a) Describe all statistical methods, including those used to control for confounding                                                                                                | Yes all statistical methods used are described in the statistical methodology section                                                       |
|                           |         | (b) Describe any methods used to examine                                                                                                                                             | N/A                                                                                                                                         |

|                   |     |                                                                                                                                                                                                              |                                                                                                                                |
|-------------------|-----|--------------------------------------------------------------------------------------------------------------------------------------------------------------------------------------------------------------|--------------------------------------------------------------------------------------------------------------------------------|
|                   |     | subgroups and interactions                                                                                                                                                                                   |                                                                                                                                |
|                   |     | (c) Explain how missing data were addressed                                                                                                                                                                  | Statistical methods paragraph 5.                                                                                               |
|                   |     | (d) If applicable, describe analytical methods taking account of sampling strategy                                                                                                                           | NA                                                                                                                             |
|                   |     | (e) Describe any sensitivity analyses                                                                                                                                                                        | Sensitivity analyses looking at sub-Saharan Africa and the whole of Africa is presented in Statistical Methodology Paragraph 6 |
| <b>Results</b>    |     |                                                                                                                                                                                                              |                                                                                                                                |
| Participants      | 13* | (a) Report numbers of individuals at each stage of study—eg numbers potentially eligible, examined for eligibility, confirmed eligible, included in the study, completing follow-up, and analysed            | NA                                                                                                                             |
|                   |     | (b) Give reasons for non-participation at each stage                                                                                                                                                         | NA                                                                                                                             |
|                   |     | (c) Consider use of a flow diagram                                                                                                                                                                           | NA                                                                                                                             |
| Descriptive data  | 14* | (a) Give characteristics of study participants (eg demographic, clinical, social) and information on exposures and potential confounders                                                                     | (a) is not applicable. Descriptive characteristics of countries is presented in Table 2.                                       |
|                   |     | (b) Indicate number of participants with missing data for each variable of interest                                                                                                                          | NA                                                                                                                             |
| Outcome data      | 15* | Report numbers of outcome events or summary measures                                                                                                                                                         | These are presented in Table 2                                                                                                 |
| Main results      | 16  | (a) Give unadjusted estimates and, if applicable, confounder-adjusted estimates and their precision (eg, 95% confidence interval). Make clear which confounders were adjusted for and why they were included | Yes this are done for univariate (unadjusted) and multivariate (adjusted) regressions (See Table 3)                            |
|                   |     | (b) Report category boundaries when continuous variables were categorized                                                                                                                                    | NA                                                                                                                             |
|                   |     | (c) If relevant, consider translating estimates of relative risk into absolute risk for a meaningful time period                                                                                             | NA                                                                                                                             |
| Other analyses    | 17  | Report other analyses done—eg analyses of subgroups and interactions, and sensitivity analyses                                                                                                               | Yes this is done. A separate analysis for sub Saharan Africa was done and findings presented.                                  |
| <b>Discussion</b> |     |                                                                                                                                                                                                              |                                                                                                                                |
| Key results       | 18  | Summarise key results with reference to study objectives                                                                                                                                                     | Discussion section paragraph 1 presents a summary of key results.                                                              |
| Limitations       | 19  | Discuss limitations of the study, taking into account sources of potential bias or imprecision. Discuss both direction and                                                                                   | The limitations are presented in the second last paragraph of the discussion section.                                          |

|                          |    |                                                                                                                                                                            |                                                                    |
|--------------------------|----|----------------------------------------------------------------------------------------------------------------------------------------------------------------------------|--------------------------------------------------------------------|
|                          |    | magnitude of any potential bias                                                                                                                                            |                                                                    |
| Interpretation           | 20 | Give a cautious overall interpretation of results considering objectives, limitations, multiplicity of analyses, results from similar studies, and other relevant evidence | This is presented in the last paragraph of the discussion section. |
| Generalisability         | 21 | Discuss the generalisability (external validity) of the study results                                                                                                      | Yes                                                                |
| <b>Other information</b> |    |                                                                                                                                                                            |                                                                    |
| Funding                  | 22 | Give the source of funding and the role of the funders for the present study and, if applicable, for the original study on which the present article is based              | A statement is provided on source of funding                       |

\*Give information separately for exposed and unexposed groups.

**Note:** An Explanation and Elaboration article discusses each checklist item and gives methodological background and published examples of transparent reporting. The STROBE checklist is best used in conjunction with this article (freely available on the Web sites of PLoS Medicine at <http://www.plosmedicine.org/>, Annals of Internal Medicine at <http://www.annals.org/>, and Epidemiology at <http://www.epidem.com/>). Information on the STROBE Initiative is available at [www.strobe-statement.org](http://www.strobe-statement.org).
